# Supplementary material for: A porcine model of phenylketonuria generated by CRISPR/Cas9 genome editing
Source: PubMed Central journal article supplement (PMC7605535; doi:10.1172/jci.insight.141523), 2020-10-15
Supplement: jciinsight-5-141523-s144.pdf [file jciinsight-5-141523-s144.pdf]

## Supplemental Material

### A porcine model of phenylketonuria generated by CRISPR/Cas9 genome editing

Erik A. Koppes<sup>1</sup>, Bethany K. Redel<sup>2</sup>, Marie A. Johnson<sup>1</sup>, Kristen J. Skvorak<sup>3,#</sup>, Lina Ghaloul-Gonzalez<sup>1,4</sup>, Megan E. Yates<sup>1</sup>, Dale W. Lewis<sup>4</sup>, Susanne M. Gollin<sup>4</sup>, Yijun L. Wu<sup>5</sup>, Shawn E. Christ<sup>6</sup>, Martine Yerle<sup>7</sup>, Angela Leshinski<sup>1</sup>, Lee D. Spate<sup>8</sup>, Joshua Benne<sup>8</sup>, Stephanie Murphy<sup>8</sup>, Melissa S. Samuel<sup>8</sup>, Eric M. Walters<sup>2,8,^</sup>, Sarah A. Hansen<sup>9</sup>, Kevin D. Wells<sup>2,8</sup>, Uta Lichter-Konecki<sup>1</sup>, Robert A. Wagner<sup>10</sup>, Joseph T. Newsome<sup>3,10</sup>, Steven F. Dobrowolski<sup>3</sup>, Jerry Vockley<sup>1,4</sup>,  
Randall S. Prather<sup>2,8</sup>, Robert D. Nicholls<sup>1</sup>

<sup>1</sup> Division of Medical Genetics, Department of Pediatrics, University of Pittsburgh School of Medicine, and UPMC Children's Hospital of Pittsburgh, Pittsburgh, Pennsylvania, USA.

<sup>2</sup> Division of Animal Sciences, College of Agriculture and Natural Resources University of Missouri, Columbia, Missouri, USA. <sup>3</sup> Department of Pathology, University of Pittsburgh, Pittsburgh, Pennsylvania, USA. <sup>4</sup> Department of Human Genetics, University of Pittsburgh Graduate School of Public Health, Pittsburgh, Pennsylvania, USA. <sup>5</sup> Department of Developmental Biology, University of Pittsburgh and UPMC Children's Hospital of Pittsburgh, Pittsburgh, Pennsylvania, USA. <sup>6</sup> Department of Psychological Sciences, University of Missouri, 210 McAlester Hall, Columbia, Missouri, USA. <sup>7</sup> GenPhySE, Université de Toulouse, INRAE, ENVT, 31326, Castanet-Tolosan, France. <sup>8</sup> National Swine Research and Resource Center (NSRRC) University of Missouri, Columbia, Missouri, USA. <sup>9</sup> Department of Veterinary Pathobiology, University of Missouri, Columbia, Missouri, USA. <sup>10</sup> Division of Laboratory Animal Resources, University of Pittsburgh, Pittsburgh Pennsylvania, USA.

#### Supplemental Material contains:

**Supplemental Tables S1 – S10, pages 2-15**

**Supplemental Figures S1 – S10, pages 16-40**

**Supplemental References, page 40**

## Supplemental Tables

**Supplemental Table S1. Exon-intron organization of the *PAH* gene in *Sus scrofa*<sup>a</sup>.**

| Exon No. | Intron-exon boundary | Exon size (bp)   | Exon-intron boundary | Intron Size (bp) |
|----------|----------------------|------------------|----------------------|------------------|
| 1        | n/a                  | 227 <sup>b</sup> | TGGGGACAGgtgagccggg  | 5763             |
| 2        | aatcctacagGAAACAAGC  | 108              | TTATTTGAGgtgagtgctt  | 13650            |
| 3        | tcttttctagGAGAATGGT  | 184              | AAGACACAGgtaagagaca  | 13164            |
| 4        | tgtgttgcagTGCCCTGGT  | 89               | GATCACCTgtgagtgac    | 13990            |
| 5        | ttcttcctagGGTTTTAAA  | 68               | CTATCGACAgtaagtttac  | 7157             |
| 6        | tgtatcctagTGGGCAGCC  | 197              | TTCTGCAGTgtgagtcac   | 2395             |
| 7        | ttgcttccagCTTGACCCG  | 136              | ACCTGAACCgtgagtagt   | 1087             |
| 8        | tgtttttcagTGACATCTG  | 70               | TTTTCCAGgtgaggaact   | 3403             |
| 9        | ctcattacagGAAATCGGC  | 57 <sup>c</sup>  | CTTGCAACAgtaagttccc  | 2433             |
| 10       | tccatttcagATTTACTGG  | 96               | GAATTACAGgtatgaccct  | 654              |
| 11       | gggcctgcagTATTGCTTG  | 134 <sup>d</sup> | GAAAGTGAGgtgagctggc  | 3172             |
| 12       | ttggtttcagGAACTTTGC  | 116              | CCATCAACGgtaagtaact  | 6161             |
| 13       | ttctttgtagGTGAAGTTG  | 622 <sup>e</sup> | n/a                  | n/a              |

<sup>a</sup> Sscrofa 11.1 (Duroc) is the reference genome assembly. <sup>b</sup> Exon 1 includes 60-nt coding. <sup>c</sup> The Sscrofa11.1 assembly is missing 1-nt at a SNP (C/T), resolved by Duroc BAC sequences [CH242-225D12 (C), CH242-276L23 (T)]. <sup>d</sup> The Sscrofa11.1 assembly is missing 1-nt at a SNP (G/C), resolved by Duroc BAC sequences [CH242-225D12 (G), CH242-276L23 (C)]. <sup>e</sup> Exon 13 includes 44-nt coding (with the stop codon), with a total coding sequence of 1359-nt (including the stop codon). The total exon (mRNA) size is 2104-nt, with the 3'-end defined by BLAST searches of the EST database, for a gene length of 75133-nt in the Duroc breed.

**Supplemental Table S2. Plasma amino acid levels in 1-month old Yucatan minipigs compared to human infants.**

| Amino acid | Range in human <sup>+,#</sup> | Range in Yucatan <sup>+,^</sup> |
|------------|-------------------------------|---------------------------------|
| Ser        | 86-270                        | 154-298                         |
| Ala        | 148-820                       | 477-678                         |
| Gln        | 315-1060                      | 261-374                         |
| Cit        | 10-70                         | 69-136                          |
| <b>Phe</b> | <b>30-120</b>                 | <b>60-123</b>                   |
| <b>Tyr</b> | <b>33-180</b>                 | <b>78-171</b>                   |
| Val        | 80-330                        | 314-633                         |
| Ile        | 20-100                        | 158-308                         |
| Leu        | 40-180                        | 158-349                         |

<sup>+</sup> values in  $\mu\text{M}$ ; <sup>#</sup> for age < 1 year; <sup>^</sup> for age 1 month.

Supplemental Table S3A. L-amino acid defined diet for swine without phenylalanine, from Dyets, Inc.

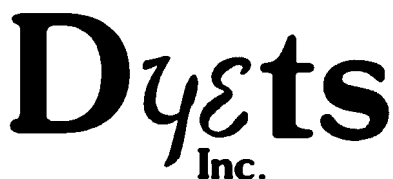

2508 Easton Ave., Bethlehem, Pennsylvania 18017  
 Within 610 Area Code: 868-7701, FAX -868-5170  
 Outside 610 Area Code: 800-275-3938

FAX: 800-329-3938  
 E-Mail Address: Sales@dyets.com

DYET# 590007

L-Amino Acid Defined Diet for Swine without Phenylalanine

|                  |        |                  |             |
|------------------|--------|------------------|-------------|
| L-Alanine        |        | 11.9             |             |
| L-Arginine, fb   |        | 14               |             |
| L-Aspartic Acid  |        | 22.6             |             |
| L-Cystine        |        | 3.5              |             |
| L-Glutamic Acid  |        | 51.6             |             |
| Glycine          |        | 12.3             |             |
| L-Histidine, f b |        | 5.4              |             |
| L-Isoleucine     |        | 8.2              |             |
| L-Leucine        |        | 16               |             |
| L-Lysine-HCl     |        | 11.4             |             |
| L-Methionine     |        | 3.5              |             |
| L-Phenylalanine  |        | 0                |             |
| L-Proline        |        | 14.4             |             |
| L-Serine         |        | 10.2             |             |
| L-Threonine      |        | 7.6              |             |
| L-Tryptophan     |        | 2.2              |             |
| L-Tyrosine       |        | 6                |             |
| L-Valine         | kcal/g | 9.5              | kcal/kg     |
|                  | 4      | total L-AA*..... | 210.3 841.2 |

| Ingredient          |      |            | gm/Kg   |         |
|---------------------|------|------------|---------|---------|
| Sucrose             | 4    |            | 150     | 600     |
| Cornstarch          | 3.6  |            | 275     | 990     |
| Dyetrose            | 3.8  |            | 100     | 380     |
| Corn Oil            | 9    |            | 150     | 1350    |
| Cellulose           | 0    |            | 50      | 0       |
| Salt Mix #290022    | 0.95 |            | 45      | 42.75   |
| Sodium Bicarbonate  | 0    |            | 7.4     | 0       |
| Vitamin Mix #390020 | 3.94 |            | 10      | 39.4    |
| Choline Bitartrate  | 0    |            | 2.3     | 0       |
|                     |      | total..... | 1000.00 | 4243.35 |

**Supplemental Table S3B. Low Phe enrichment foods.**

| <b>LOW PHE ENRICHMENT FOODS FOR PKU PIGS</b>             |                           |                 |
|----------------------------------------------------------|---------------------------|-----------------|
| <b>Item</b>                                              | <b>Amounts</b>            | <b>PHE (mg)</b> |
| Apple Rings                                              | 10 rings (~3/4 cup)       | 17              |
| Apples                                                   | 1 apple                   | 11              |
| Applesauce                                               | 1 cup                     | 13              |
| Blueberries                                              | 1/2 cup                   | 18              |
| Carrot                                                   | 1/2 cup                   | 18              |
| Cranberries (Dried or Fresh/Frozen)                      | 1/2 c                     | 18              |
| Cucumber                                                 | 1/4 piece                 | 15              |
| Fruit Juice (Apple, Cranberry, Grape, Pineapple, Orange) | 1 cup                     | 2-30            |
| Grapes                                                   | 1/2 cup                   | 15              |
| Honey                                                    | 2 T. Use sparingly        | 5               |
| Ice Cream Cones                                          | 1 cone                    | 16              |
| Jelly                                                    | 1/4 cup                   | 17              |
| Marshmallows                                             | 30 mini 1x/week           | 9               |
| Papaya                                                   | 1/2 c                     | 18              |
| Mushrooms                                                | 6                         | 21              |
| Pears                                                    | 1 pear                    | 20              |
| Pumpkin                                                  | 1/4 c raw OR 1/8 c canned | 10              |
| Radishes                                                 | 4 small OR 2 lg           | 6               |
| Romaine                                                  | 1/2 cup                   | 15              |
| Strawberries                                             | 10 berries                | 14              |
| Watermelon                                               | ½ cup                     | 12              |

**Supplemental Table S3C. Low Phe enrichment foods.**

| Item                                          | Vendor | Stipulations?                     | Servings (Maximum daily)        |                                   |                                          |                                   |                                 | PHE (mg) |
|-----------------------------------------------|--------|-----------------------------------|---------------------------------|-----------------------------------|------------------------------------------|-----------------------------------|---------------------------------|----------|
|                                               |        |                                   | <50 lbs.                        | 50-100 lbs.                       | 100-200 lbs.                             | 200-400 lbs.                      | >400 lbs.                       |          |
| <b>Routine Use</b>                            |        |                                   |                                 |                                   |                                          |                                   |                                 |          |
| Peas, Dried                                   | Jordan |                                   | 1/4 cup                         | 1/2 cup                           | <b>3/4 cup</b>                           | 1 1/2 cups                        | 2 cups                          | 218      |
| Apple Rings                                   | Jordan |                                   | 10 rings (~3/4 cup)             | 10 rings (~3/4 cup)               | <b>10 rings (~3/4 cup)</b>               | 10 rings (~3/4 cup)               | 10 rings (~3/4 cup)             | 17       |
| Corn                                          | Jordan |                                   | 1/4 cup                         | 1/2 cup                           | <b>3/4 cup</b>                           | 1 1/2 cups                        | 2 cups                          | 163      |
| Broccoli                                      | Jordan |                                   | 1 stalk-baseball size           | 1 stalk-baseball size             | <b>1 stalk-baseball size</b>             | 1 stalk-baseball size             | 1 stalk-baseball size           | 177      |
| Kale                                          | Jordan |                                   | 1 cup                           | 1 cup                             | <b>1 cup</b>                             | 1 cup                             | 1 cup                           | 96       |
| Romaine                                       | Jordan |                                   | 1 cup                           | 1 cup                             | <b>1 cup</b>                             | 1 cup                             | 1 cup                           | 31       |
| <b>Occasional Use (Training, Etc. Treats)</b> |        |                                   |                                 |                                   |                                          |                                   |                                 |          |
| <b>Fresh Produce</b>                          |        |                                   |                                 |                                   |                                          |                                   |                                 |          |
| Apples                                        | Jordan |                                   | 1/2 apple                       | 1 apple                           | <b>1 apple</b>                           | 1 apple                           | 1 apple                         | 11       |
| Carrots                                       | Jordan |                                   | 1 carrot                        | 1 carrot                          | <b>1 carrot</b>                          | 1 carrot                          | 1 carrot                        | 37       |
| Cucumber                                      | Jordan |                                   | 1/2 piece                       | 1/2 piece                         | <b>1/2 piece</b>                         | 1/2 piece                         | 1/2 piece                       | 29       |
| Grapes                                        | Jordan |                                   | 1 cup/~30                       | 1 cup/~30                         | <b>1 cup/~30</b>                         | 1 cup/~30                         | 1 cup/~30                       | 29       |
| Pears                                         | Jordan |                                   | 1/2 pear                        | 1 pear                            | <b>1 pear</b>                            | 1 pear                            | 1 pear                          | 20       |
| Peppers, Green                                | Jordan |                                   | 1 pepper                        | 1 pepper                          | <b>1 pepper</b>                          | 1 pepper                          | 1 pepper                        | 109      |
| Potatoes                                      | Jordan |                                   | 1 small-3"                      | 1 lg-5"                           | <b>1 lg-5"</b>                           | 1 lg-5"                           | 1 lg-5"                         | 299      |
| Potatoes, Sweet                               | Jordan |                                   | 1 small-3"                      | 1 lg-5"                           | <b>1 lg-5"</b>                           | 1 lg-5"                           | 1 lg-5"                         | 116      |
| Pumpkin                                       | Jordan |                                   | 1/4 small size raw, 1/8c canned | 1/2 small size raw, 1/8 c. canned | <b>1/2 small size raw, 1/4 c. canned</b> | 1/2 small size raw, 1/4 c. canned | 1 small size raw, 1/4 c. canned | 21       |
| Radishes                                      | Jordan |                                   | 2 small/1 lg                    | 4 small/2 lg                      | <b>4 small/2 lg</b>                      | 4 small/2 lg                      | 4 small/2 lg                    | 6        |
| Raisins                                       | Jordan |                                   | 1/4 cup                         | 1/2 cup                           | <b>3/4 cup</b>                           | 1 1/2 cups                        | 2 cups                          | 71       |
| Zucchini                                      | Jordan |                                   | 1/2 piece                       | 1/2 piece                         | <b>1/2 piece</b>                         | 1/2 piece                         | 1/2 piece                       | 42       |
| <b>Dried Fruits, etc.</b>                     |        |                                   |                                 |                                   |                                          |                                   |                                 |          |
| Banana Chips                                  | Jordan |                                   | 1/2 cup/~20                     | 1 cup/~40                         | <b>1 cup/~40</b>                         | 1 cup/~40                         | 1 cup/~40                       | 73       |
| Cranberries, Dried (Craisins)                 | Jordan |                                   | 1/4 cup                         | 1/2 cup                           | <b>3/4 cup</b>                           | 1 1/2 cups                        | 2 cups                          | 18       |
| <b>Grocery</b>                                |        |                                   |                                 |                                   |                                          |                                   |                                 |          |
| Applesauce                                    | GFS    |                                   | 1 cup                           | 1 cup                             | <b>1 cup</b>                             | 1 cup                             | 1 cup                           | 13       |
| Cheerios                                      | GFS    |                                   | 1 cup                           | 1 cup                             | <b>1 cup</b>                             | 1 cup                             | 1 cup                           | 176      |
| Crackers (Saltine)                            | GFS    | Use low salt versions             | 5                               | 10                                | <b>10</b>                                | 10                                | 10                              | 135      |
| Dry pasta                                     | GFS    |                                   | 1/4 cup                         | 1/2 cup                           | <b>3/4 cup</b>                           | 1 1/2 cups                        | 2 cups                          | 286      |
| Fruit Juice                                   | GFS    |                                   | 1 cup                           | 1 cup                             | <b>1 cup</b>                             | 1 cup                             | 1 cup                           | 2        |
| Graham Crackers                               | GFS    |                                   | 1-2.5"x5" piece                 | 2-2.5"x5" pieces                  | <b>2-2.5"x5" pieces</b>                  | 2-2.5"x5" pieces                  | 2-2.5"x5" pieces                | 97       |
| Ice Cream Cones                               | GFS    |                                   | 1 cone                          | 1 cone                            | <b>1 cone</b>                            | 1 cone                            | 1 cone                          | 16       |
| Honey                                         | GFS    |                                   | 1 Tbsp. (ping pong ball size)   | 2 Tbsp. (ping pong ball size)     | <b>2 Tbsp. (ping pong ball size)</b>     | 2 Tbsp. (ping pong ball size)     | 2 Tbsp. (ping pong ball size)   | 5        |
| Jam/Jelly/Marmalade                           | GFS    |                                   | 1/4 cup                         | 1/2 cup                           | <b>1/2 cup</b>                           | 1/2 cup                           | 1/2 cup                         | 34       |
| Jell-o                                        | GFS    |                                   | 1/2 cup prepared; 1/4 pack dry  | 1 cup prepared; 1/2 pack dry      | <b>1 cup prepared; 1/2 pack dry</b>      | 1 cup prepared; 1/2 pack dry      | 1 cup prepared; 1/2 pack dry    | 76       |
| Marshmallows                                  | GFS    | Small amounts; use sparingly      | 15 mini; once/week              | 30 mini; once/week                | <b>30 mini; once/week</b>                | 30 mini; once/week                | 30 mini; once/week              | 9        |
| Oatmeal                                       | GFS    |                                   | 1/4 cup                         | 1/2 cup                           | <b>3/4 cup</b>                           | 1 1/2 cups                        | 2 cups                          | 488      |
| Popcorn                                       | GFS    | Use air popped ONLY, no microwave | 1 cup                           | 2 cups                            | <b>2 cups</b>                            | 2 cups                            | 2 cups                          | 94       |
| Vanilla Wafers                                | GFS    |                                   | 5                               | 10                                | <b>10</b>                                | 10                                | 10                              | 105      |

**Supplemental Table S4. Volumetric analysis of the brain from T<sub>1</sub>-weighted MRI in the affected PKU pig vs. female control pig.** Volumes are averages from manual segmentation of two independent observers, with normalized volumes expressed as % of control and calculated by 1) cortical regions normalized to total cerebrum, and 2) cerebellum and ventricles normalized to total brain (normalized values greater than a 10% difference between pigs are in bold).

| Brain Region         | <u>Brain Volumes (mm<sup>3</sup>)</u> |       | <u>Normalized Volumes (%)</u> |
|----------------------|---------------------------------------|-------|-------------------------------|
|                      | Control                               | PKU   | PKU                           |
| Cortical Gray Matter | 36614                                 | 24568 | <b>89</b>                     |
| White Matter         | 33052                                 | 25226 | 101                           |
| Subcortical Regions  | 22555                                 | 19912 | <b>117</b>                    |
| Total Cerebrum       | 92221                                 | 69707 | -                             |
| Ventricles           | 3053                                  | 4818  | <b>209</b>                    |
| Cerebellum           | 12518                                 | 7060  | <b>77</b>                     |
| Total Brain          | 107792                                | 81585 | -                             |

**Supplemental Table S5. Diffusion tensor imaging (DTI) parameters.**

| DTI Parameter                                                             | White Matter |      | Cortical Gray Matter |      |
|---------------------------------------------------------------------------|--------------|------|----------------------|------|
|                                                                           | Control      | PKU  | Control              | PKU  |
| Apparent Diffusion Coefficient (ADC, 10 <sup>-3</sup> mm <sup>2</sup> /s) | 0.75         | 0.76 | 1.09                 | 1.05 |
| Fractional Anisotropy (FA)                                                | 0.41         | 0.39 | 0.16                 | 0.17 |
| Axial Diffusivity (AD, 10 <sup>-3</sup> mm <sup>2</sup> /s)               | 1.08         | 1.08 | 1.24                 | 1.21 |
| Radial Diffusivity (RD, 10 <sup>-3</sup> mm <sup>2</sup> /s)              | 0.58         | 0.60 | 1.01                 | 0.98 |

**Supplemental Table S6. Structural variants (SVs) detected in the targeted *PAH* exon 6 region.** WGS sequencing and SV analysis confirmed the deletion sizes of the two exon 6 deletions (116-1 deletion allele 1, 1166-nt; 116-2 deletion allele, 1224-nt) and for the extended exon 6-7 deletion (116-1 deletion allele 2, 4063-nt). Note that the 12-nt insertion-duplication in 116-1 allele-1, the TCTC microhomology of 116-1 allele-2, and the shared A at the 116-2 deletion breakpoint are also detected by this analysis.

| Sample | Chr | Pos      | Ref | Alt | End      | SVLen | SVIns | SVInsSeq     | HomLen | HomSeq |
|--------|-----|----------|-----|-----|----------|-------|-------|--------------|--------|--------|
| 116-1  | 5   | 81439023 | G   | DEL | 81440189 | 1166  | 12    | CTGGGCTCTGCC |        |        |
| 116-1  | 5   | 81438943 | C   | DEL | 81443006 | 4063  |       |              | 4      | TCTC   |
| 116-2  | 5   | 81439021 | T   | DEL | 81440245 | 1224  |       |              | 1      | A      |

**Supplemental Table S7. Single nucleotide variants (SNVs) detected in the targeted *PAH* exon 6 region associated with genome-editing events.** Pertinent SNVs extracted from Variant Call Format (VCF) files derived from WGS and SNV analysis. At both the proximal sgRNA5-1 and distal sgRNA6-2 site SNVs associated with deletion and scarred alleles were detected and confirm genomic sequencing of deletion breakpoint and sgRNA site PCRs.

| Sample | Chr | Pos      | Ref     | Alt    | Qual  | Info           | Note                                                            |
|--------|-----|----------|---------|--------|-------|----------------|-----------------------------------------------------------------|
| 116-2  | 5   | 81439023 | G       | GTTTT  | 89.14 | AC=2;AF=1.000; | Scarred Allele 5-1 ins                                          |
| 116-1  | 5   | 81439024 | T       | C      | 35.02 | AC=2;AF=1.000; | Aberrant SNP called where ins/dup starts at position PAM -4     |
| 116-1  | 5   | 81440223 | C       | T      | 74.08 | AC=2;AF=1.000; | Induced SNP within retained intron 6 region of allele-1 ins/dup |
| 116-1  | 5   | 81440242 | CAAG    | C      | 77.15 | AC=2;AF=1.000; | 116-1 allele-1 3-nt deletion at 6-2 sgRNA                       |
| 116-2  | 5   | 81440242 | CAAGAAA | C      | 50.01 | AC=1;AF=0.500; | Scarred Allele 6-2 del                                          |
| 116-2  | 5   | 81440249 | A       | ATTACC | 50    | AC=1;AF=0.500; | Scarred Allele 6-2 ins                                          |

**Supplemental Table S8. Single nucleotide variants (SNV) detected at potential guide RNA off-target sites.** (A) For sgRNA5-1, SNVs were identified in 14 of 129 potential off-target sites in 116-1, 116-2, or Yucatan. (B) For sgRNA6-2, SNVs were identified in 8 of 63 potential off-target sites in 116-1, 116-2, or Yucatan. Off-targets were predicted by CRISPOR.



Supplemental Table S8A. SNVs detected at potential sgRNA5-1 off-target sites.

| Sample  | CHROM | POS       | ID | REF     | ALT  | QUAL   | FILTER | INFO                                                                                                                                                 |
|---------|-------|-----------|----|---------|------|--------|--------|------------------------------------------------------------------------------------------------------------------------------------------------------|
| 116-1   | 1     | 52370840  | .  | T       | A    | 48.85  | PASS   | AC=1;AF=0.500;AN=2;DP=30;FS=3.453;MQ=245.71;MQRankSum=3.837;QD=1.63;ReadPosRankSum=0.197;SOR=1.609;FractionInformativeReads=0.967;R2_5P_bias=7.319   |
| Yuc:GFP | 1     | 52370840  | .  | T       | A    | 48.97  | PASS   | AC=1;AF=0.500;AN=2;DP=19;FS=1.820;MQ=250.00;MQRankSum=3.592;QD=2.58;ReadPosRankSum=-0.454;SOR=0.330;FractionInformativeReads=1.000;R2_5P_bias=9.942  |
| 116-1   | 1     | 52370858  | .  | T       | C    | 49.03  | PASS   | AC=1;AF=0.500;AN=2;DP=28;FS=0.000;MQ=250.00;MQRankSum=4.367;QD=1.75;ReadPosRankSum=-0.366;SOR=0.951;FractionInformativeReads=0.964;R2_5P_bias=-4.227 |
| Yuc:GFP | 1     | 52370858  | .  | T       | C    | 49.38  | PASS   | AC=1;AF=0.500;AN=2;DP=15;FS=0.000;MQ=250.00;MQRankSum=3.034;QD=3.29;ReadPosRankSum=-1.097;SOR=0.368;FractionInformativeReads=0.933;R2_5P_bias=6.313  |
| 116-2   | 1     | 164175680 | .  | T       | C    | 50     | PASS   | AC=1;AF=0.500;AN=2;DP=45;FS=4.246;MQ=244.72;MQRankSum=4.766;QD=1.11;ReadPosRankSum=4.926;SOR=0.897;FractionInformativeReads=1.000;R2_5P_bias=17.303  |
| Yuc:GFP | 1     | 164175680 | .  | T       | C    | 50     | PASS   | AC=1;AF=0.500;AN=2;DP=53;FS=0.000;MQ=246.00;MQRankSum=5.357;QD=0.94;ReadPosRankSum=2.886;SOR=0.739;FractionInformativeReads=1.000;R2_5P_bias=13.242  |
| Yuc:GFP | 1     | 164175681 | .  | G       | A    | 50     | PASS   | AC=1;AF=0.500;AN=2;DP=54;FS=0.000;MQ=246.07;MQRankSum=5.423;QD=0.93;ReadPosRankSum=2.886;SOR=0.801;FractionInformativeReads=1.000;R2_5P_bias=14.630  |
| 116-1   | 2     | 118033142 | .  | G       | A    | 49.92  | PASS   | AC=1;AF=0.500;AN=2;DP=27;FS=0.000;MQ=250.00;MQRankSum=4.392;QD=1.85;ReadPosRankSum=2.548;SOR=0.836;FractionInformativeReads=1.000;R2_5P_bias=-0.450  |
| 116-2   | 2     | 118033142 | .  | G       | A    | 50     | PASS   | AC=1;AF=0.500;AN=2;DP=29;FS=0.000;MQ=250.00;MQRankSum=4.433;QD=1.72;ReadPosRankSum=3.969;SOR=0.941;FractionInformativeReads=0.966;R2_5P_bias=0.014   |
| 116-1   | 3     | 17468660  | .  | A       | AG   | 127.11 | PASS   | AC=2;AF=1.000;AN=2;DP=31;FS=0.000;MQ=240.04;QD=4.10;SOR=0.765;FractionInformativeReads=0.871                                                         |
| 116-2   | 3     | 17468660  | .  | A       | AG   | 168.71 | PASS   | AC=2;AF=1.000;AN=2;DP=44;FS=0.000;MQ=236.49;QD=3.83;SOR=1.206;FractionInformativeReads=0.932                                                         |
| Yuc:GFP | 3     | 17468660  | .  | A       | AG   | 132.21 | PASS   | AC=2;AF=1.000;AN=2;DP=33;FS=0.000;MQ=249.26;QD=4.01;SOR=1.255;FractionInformativeReads=0.879                                                         |
| 116-2   | 3     | 22588397  | .  | C       | T    | 49.33  | PASS   | AC=1;AF=0.500;AN=2;DP=53;FS=1.035;MQ=250.00;MQRankSum=6.158;QD=0.93;ReadPosRankSum=1.074;SOR=0.859;FractionInformativeReads=0.981;R2_5P_bias=20.356  |
| Yuc:GFP | 3     | 22588397  | .  | C       | T    | 46.4   | PASS   | AC=1;AF=0.500;AN=2;DP=48;FS=11.701;MQ=250.00;MQRankSum=5.755;QD=0.97;ReadPosRankSum=2.309;SOR=2.419;FractionInformativeReads=0.979;R2_5P_bias=12.812 |
| 116-1   | 3     | 123499714 | .  | A       | G    | 50     | PASS   | AC=1;AF=0.500;AN=2;DP=53;FS=2.500;MQ=247.93;MQRankSum=4.799;QD=0.94;ReadPosRankSum=3.219;SOR=0.497;FractionInformativeReads=0.981;R2_5P_bias=15.112  |
| 116-2   | 3     | 123499714 | .  | A       | G    | 107.03 | PASS   | AC=2;AF=1.000;AN=2;DP=21;FS=0.000;MQ=250.00;QD=5.10;SOR=1.721;FractionInformativeReads=0.952                                                         |
| Yuc:GFP | 3     | 123499714 | .  | A       | G    | 124.16 | PASS   | AC=2;AF=1.000;AN=2;DP=26;FS=0.000;MQ=250.00;QD=4.78;SOR=0.846;FractionInformativeReads=1.000                                                         |
| 116-1   | 3     | 123926379 | .  | C       | G    | 157.21 | PASS   | AC=2;AF=1.000;AN=2;DP=38;FS=0.000;MQ=250.00;QD=4.14;SOR=0.859;FractionInformativeReads=0.974                                                         |
| 116-2   | 3     | 123926379 | .  | C       | G    | 150.68 | PASS   | AC=2;AF=1.000;AN=2;DP=38;FS=0.000;MQ=250.00;MQRankSum=1.641;QD=3.97;ReadPosRankSum=-0.274;SOR=0.293;FractionInformativeReads=1.000;R2_5P_bias=0.000  |
| Yuc:GFP | 3     | 123926379 | .  | C       | G    | 125.01 | PASS   | AC=2;AF=1.000;AN=2;DP=28;FS=0.000;MQ=250.00;QD=4.46;SOR=0.846;FractionInformativeReads=0.929                                                         |
| 116-1   | 8     | 129310255 | .  | G       | A    | 46.79  | PASS   | AC=1;AF=0.500;AN=2;DP=36;FS=1.434;MQ=247.77;MQRankSum=4.771;QD=1.30;ReadPosRankSum=-0.461;SOR=1.071;FractionInformativeReads=0.917;R2_5P_bias=15.497 |
| 116-2   | 8     | 129310255 | .  | G       | A    | 49.47  | PASS   | AC=1;AF=0.500;AN=2;DP=17;FS=0.000;MQ=247.20;MQRankSum=3.281;QD=2.91;ReadPosRankSum=0.000;SOR=0.735;FractionInformativeReads=0.941;R2_5P_bias=8.303   |
| 116-1   | 9     | 11406822  | .  | C       | CACG | 32.53  | PASS   | AC=1;AF=0.500;AN=2;DP=11;FS=3.090;MQ=32.08;MQRankSum=0.678;QD=2.96;ReadPosRankSum=-1.246;SOR=0.078;FractionInformativeReads=1.000;R2_5P_bias=7.270   |
| Yuc:GFP | 9     | 11406822  | .  | C       | CACG | 51.63  | PASS   | AC=2;AF=1.000;AN=2;DP=5;FS=0.000;MQ=39.90;QD=10.33;SOR=1.981;FractionInformativeReads=1.000                                                          |
| 116-1   | 9     | 11406824  | .  | AGGGAGG | A    | 30.82  | PASS   | AC=1;AF=0.500;AN=2;DP=11;FS=7.368;MQ=32.08;MQRankSum=0.546;QD=2.80;ReadPosRankSum=-0.895;SOR=0.847;FractionInformativeReads=0.909;R2_5P_bias=17.501  |
| Yuc:GFP | 9     | 11406824  | .  | AGGGAGG | A    | 48.93  | PASS   | AC=2;AF=1.000;AN=2;DP=5;FS=0.000;MQ=39.90;QD=9.79;SOR=3.258;FractionInformativeReads=0.800                                                           |
| 116-2   | 9     | 11759440  | .  | C       | T    | 50     | PASS   | AC=1;AF=0.500;AN=2;DP=44;FS=6.930;MQ=196.86;MQRankSum=2.575;QD=1.14;ReadPosRankSum=1.609;SOR=0.795;FractionInformativeReads=1.000;R2_5P_bias=-3.203  |
| Yuc:GFP | 14    | 20180376  | .  | T       | C    | 50     | PASS   | AC=1;AF=0.500;AN=2;DP=24;FS=0.000;MQ=250.00;MQRankSum=4.128;QD=2.08;ReadPosRankSum=2.742;SOR=0.693;FractionInformativeReads=1.000;R2_5P_bias=7.553   |
| 116-1   | 15    | 29503986  | .  | A       | G    | 131.1  | PASS   | AC=2;AF=1.000;AN=2;DP=28;FS=0.000;MQ=250.00;QD=4.68;SOR=0.836;FractionInformativeReads=1.000                                                         |
| 116-2   | 15    | 29503986  | .  | A       | G    | 137.1  | PASS   | AC=2;AF=1.000;AN=2;DP=30;FS=0.000;MQ=249.51;QD=4.57;SOR=1.329;FractionInformativeReads=1.000                                                         |
| Yuc:GFP | 15    | 29503986  | .  | A       | G    | 122.05 | PASS   | AC=2;AF=1.000;AN=2;DP=26;FS=0.000;MQ=250.00;QD=4.69;SOR=0.941;FractionInformativeReads=0.962                                                         |
| 116-1   | 15    | 30672405  | .  | G       | A    | 50     | PASS   | AC=1;AF=0.500;AN=2;DP=43;FS=0.000;MQ=250.00;MQRankSum=5.385;QD=1.16;ReadPosRankSum=1.575;SOR=0.627;FractionInformativeReads=0.953;R2_5P_bias=1.978   |
| Yuc:GFP | 15    | 30672405  | .  | G       | A    | 49.47  | PASS   | AC=1;AF=0.500;AN=2;DP=40;FS=1.273;MQ=245.93;MQRankSum=5.166;QD=1.24;ReadPosRankSum=-2.210;SOR=0.657;FractionInformativeReads=0.925;R2_5P_bias=17.486 |
| 116-1   | 15    | 119050524 | .  | A       | G    | 37.41  | PASS   | AC=1;AF=0.500;AN=2;DP=44;FS=1.438;MQ=250.00;MQRankSum=4.705;QD=0.85;ReadPosRankSum=2.335;SOR=1.165;FractionInformativeReads=0.818;R2_5P_bias=17.783  |
| Yuc:GFP | 15    | 119050524 | .  | A       | G    | 50     | PASS   | AC=1;AF=0.500;AN=2;DP=38;FS=2.798;MQ=250.00;MQRankSum=5.102;QD=1.32;ReadPosRankSum=3.707;SOR=0.553;FractionInformativeReads=0.947;R2_5P_bias=-6.745  |
| 116-2   | 17    | 2120497   | .  | C       | CA   | 50     | PASS   | AC=1;AF=0.500;AN=2;DP=27;FS=3.473;MQ=250.00;MQRankSum=4.367;QD=1.85;ReadPosRankSum=0.366;SOR=0.957;FractionInformativeReads=1.000;R2_5P_bias=-13.336 |
| Yuc:GFP | 17    | 2120497   | .  | C       | CA   | 50     | PASS   | AC=1;AF=0.500;AN=2;DP=40;FS=1.302;MQ=249.01;MQRankSum=4.850;QD=1.25;ReadPosRankSum=0.535;SOR=0.502;FractionInformativeReads=0.925;R2_5P_bias=-9.032  |
| 116-1   | 17    | 2120498   | .  | A       | AG   | 173.35 | PASS   | AC=2;AF=1.000;AN=2;DP=43;FS=0.000;MQ=246.00;QD=4.03;SOR=1.005;FractionInformativeReads=0.977                                                         |
| 116-2   | 17    | 2120498   | .  | A       | AG   | 49.06  | PASS   | AC=1;AF=0.500;AN=2;DP=27;FS=3.473;MQ=250.00;MQRankSum=4.367;QD=1.82;ReadPosRankSum=-0.464;SOR=0.819;FractionInformativeReads=1.000;R2_5P_bias=17.618 |
| Yuc:GFP | 17    | 2120498   | .  | A       | AG   | 40.37  | PASS   | AC=1;AF=0.500;AN=2;DP=40;FS=1.302;MQ=249.01;MQRankSum=4.850;QD=1.01;ReadPosRankSum=-0.503;SOR=0.929;FractionInformativeReads=0.925;R2_5P_bias=18.493 |

Supplemental Table S8B. SNVs detected at potential sgRNA6-2 off-target sites.

| Sample  | CHROM | POS       | ID | REF | ALT | QUAL   | FILTER | INFO                                                                                                                                                 |
|---------|-------|-----------|----|-----|-----|--------|--------|------------------------------------------------------------------------------------------------------------------------------------------------------|
| 116-1   | 2     | 17821848  | .  | C   | T   | 49.03  | PASS   | AC=1;AF=0.500;AN=2;DP=36;FS=1.341;MQ=242.06;MQRankSum=3.168;QD=1.36;ReadPosRankSum=1.767;SOR=0.412;FractionInformativeReads=1.000;R2_5P_bias=10.199  |
| 116-2   | 2     | 17821848  | .  | C   | T   | 44.49  | PASS   | AC=1;AF=0.500;AN=2;DP=59;FS=5.322;MQ=250.00;MQRankSum=6.390;QD=0.75;ReadPosRankSum=0.731;SOR=1.089;FractionInformativeReads=0.983;R2_5P_bias=-8.189  |
| Yuc:GFP | 5     | 30700216  | .  | C   | T   | 49.65  | PASS   | AC=1;AF=0.500;AN=2;DP=21;FS=0.000;MQ=250.00;MQRankSum=3.723;QD=2.36;ReadPosRankSum=1.064;SOR=0.722;FractionInformativeReads=0.952;R2_5P_bias=-2.527  |
| Yuc:GFP | 5     | 30700221  | .  | T   | C   | 49.58  | PASS   | AC=1;AF=0.500;AN=2;DP=21;FS=0.000;MQ=250.00;MQRankSum=3.723;QD=2.36;ReadPosRankSum=1.216;SOR=0.446;FractionInformativeReads=0.952;R2_5P_bias=4.477   |
| 116-1   | 6     | 66055371  | .  | T   | C   | 50     | PASS   | AC=1;AF=0.500;AN=2;DP=38;FS=1.273;MQ=247.63;MQRankSum=5.166;QD=1.32;ReadPosRankSum=3.642;SOR=0.811;FractionInformativeReads=0.974;R2_5P_bias=-5.805  |
| 116-2   | 6     | 66055371  | .  | T   | C   | 167.23 | PASS   | AC=2;AF=1.000;AN=2;DP=41;FS=0.000;MQ=250.00;QD=4.08;SOR=0.793;FractionInformativeReads=0.976                                                         |
| Yuc:GFP | 6     | 66055371  | .  | T   | C   | 212.01 | PASS   | AC=2;AF=1.000;AN=2;DP=56;FS=0.000;MQ=249.89;QD=3.79;SOR=0.729;FractionInformativeReads=0.982                                                         |
| 116-1   | 8     | 115803643 | .  | A   | G   | 140.17 | PASS   | AC=2;AF=1.000;AN=2;DP=32;FS=0.000;MQ=250.00;QD=4.38;SOR=0.756;FractionInformativeReads=0.969                                                         |
| 116-2   | 8     | 115803643 | .  | A   | G   | 50     | PASS   | AC=1;AF=0.500;AN=2;DP=43;FS=0.000;MQ=250.00;MQRankSum=5.509;QD=1.16;ReadPosRankSum=1.112;SOR=0.648;FractionInformativeReads=0.977;R2_5P_bias=-7.415  |
| Yuc:GFP | 9     | 7171091   | .  | T   | G   | 50     | PASS   | AC=1;AF=0.500;AN=2;DP=50;FS=2.509;MQ=249.18;MQRankSum=5.881;QD=1.00;ReadPosRankSum=-0.291;SOR=0.745;FractionInformativeReads=0.960;R2_5P_bias=8.256  |
| 116-1   | 9     | 7171107   | .  | A   | G   | 45.89  | PASS   | AC=1;AF=0.500;AN=2;DP=25;FS=0.000;MQ=250.00;MQRankSum=4.048;QD=1.84;ReadPosRankSum=0.991;SOR=0.653;FractionInformativeReads=1.000;R2_5P_bias=1.122   |
| 116-2   | 9     | 7171107   | .  | A   | G   | 48.52  | PASS   | AC=1;AF=0.500;AN=2;DP=64;FS=0.000;MQ=250.00;MQRankSum=6.658;QD=0.76;ReadPosRankSum=0.893;SOR=0.794;FractionInformativeReads=0.953;R2_5P_bias=5.081   |
| Yuc:GFP | 9     | 7171107   | .  | A   | G   | 193.69 | PASS   | AC=2;AF=1.000;AN=2;DP=51;FS=0.000;MQ=249.20;QD=3.80;SOR=0.818;FractionInformativeReads=0.961                                                         |
| 116-1   | 9     | 16703942  | .  | T   | A   | 46.13  | PASS   | AC=1;AF=0.500;AN=2;DP=38;FS=7.666;MQ=250.00;MQRankSum=4.981;QD=1.21;ReadPosRankSum=0.373;SOR=1.144;FractionInformativeReads=0.947;R2_5P_bias=16.448  |
| 116-2   | 9     | 16703942  | .  | T   | A   | 49.71  | PASS   | AC=1;AF=0.500;AN=2;DP=31;FS=3.155;MQ=247.61;MQRankSum=4.635;QD=1.60;ReadPosRankSum=-1.226;SOR=1.329;FractionInformativeReads=0.968;R2_5P_bias=18.184 |
| 116-1   | 14    | 86614839  | .  | C   | A   | 46.29  | PASS   | AC=1;AF=0.500;AN=2;DP=31;FS=0.000;MQ=250.00;MQRankSum=4.603;QD=1.49;ReadPosRankSum=3.832;SOR=0.602;FractionInformativeReads=1.000;R2_5P_bias=18.425  |
| Yuc:GFP | 14    | 86614839  | .  | C   | A   | 50     | PASS   | AC=1;AF=0.500;AN=2;DP=25;FS=1.623;MQ=250.00;MQRankSum=4.048;QD=2.00;ReadPosRankSum=3.142;SOR=0.814;FractionInformativeReads=1.000;R2_5P_bias=-8.367  |
| 116-1   | 15    | 41392819  | .  | G   | A   | 49.94  | PASS   | AC=1;AF=0.500;AN=2;DP=39;FS=0.000;MQ=250.00;MQRankSum=5.324;QD=1.28;ReadPosRankSum=1.840;SOR=0.610;FractionInformativeReads=1.000;R2_5P_bias=-4.389  |
| Yuc:GFP | 15    | 41392819  | .  | G   | A   | 38.97  | PASS   | AC=1;AF=0.500;AN=2;DP=36;FS=3.329;MQ=250.00;MQRankSum=4.485;QD=1.08;ReadPosRankSum=2.762;SOR=0.947;FractionInformativeReads=0.917;R2_5P_bias=40.583  |

**Supplemental Table S9. Single nucleotide variant (SNV) at SNP RS1108162262 distinguishing 116-1 deletion alleles.** This SNP at chromosome 5:81443104 is a T in the reference (REF) genome and precedes an adjacent 10A/11A homopolymer length polymorphism. The latter 11A allele (the ALT SNP is written TA due to the additional A nucleotide adjacent to the T) is homozygous in both Yucatan and 116-2 (as shown by AC=2; AF=1.000 where AF is allele frequency). In contrast this SNP is heterozygous (AC=1; AF=0.500) in 116-1 (affected PKU pig).

| Sample  | Chr | POS      | REF | ALT | QUAL   | INFO          |
|---------|-----|----------|-----|-----|--------|---------------|
| 116-1   | 5   | 81443104 | T   | TA  | 50     | AC=1;AF=0.500 |
| 116-2   | 5   | 81443104 | T   | TA  | 126.13 | AC=2;AF=1.000 |
| Yuc:GFP | 5   | 81443104 | T   | TA  | 125.32 | AC=2;AF=1.000 |

**Supplemental Table S10. PCR primers and sgRNA oligonucleotides used in this study.** (A) Off-target PCR primers [top 10 predictions for sgRNA5-1 (*PAH* intron 5) and sgRNA6-2 (*PAH* intron 6) using the original MIT CRISPR program]. (B) Pig *PAH* genomic and reverse transcription (RT)-PCR primers. (C) Other PCR primers. (D) *BbsI* site oligonucleotide cloning adapters for sgRNAs.

Supplemental Table S10A. Off-target genomic PCR primers.

| On-Target                   | Sequence                 |
|-----------------------------|--------------------------|
| sgRNA5-1 (PAH intron 5)     | CCGTAGTTTTGTTCTGCCATAGC  |
| Reverse complement sgRNA5-1 | GCTATGGCAGAACAAAACCTACGG |
| sgRNA6-2 (PAH intron 6)     | GTCTACCGCCATCCAAGAAAAGG  |

| Off Target PCR Primer            | Primer Sequence                | Off Target Prediction     | MIT score | mismatches      | Scrofa 11.1 location | Overlapping gene  |
|----------------------------------|--------------------------------|---------------------------|-----------|-----------------|----------------------|-------------------|
| PKU pig sgRNA5-1 off-target 1 F  | 5'-GACAAAATACTCCGAAACGCTG-3'   | GCTATATCAGAACAAAACCTAGAG  | 2.2       | 2MMs [6:7]      | 4: +88805601         | ATF6              |
| PKU pig sgRNA5-1 off-target 1 R  | 5'-GAGGCAGCTCTAACGAATGTG-3'    |                           |           |                 |                      |                   |
| PKU pig sgRNA5-1 off-target 2 F  | 5'-CTGTTGACAAAGTATGAGTATGGC-3' | AAATATGCCAGAACAAAACCTATGG | 1.7       | 3MMs [1:2:7]    | 16: +58034454        | intergenic        |
| PKU pig sgRNA5-1 off-target 2 R  | 5'-GTCAAGTTTCAGTGAGGACAAAAC-3' |                           |           |                 |                      |                   |
| PKU pig sgRNA5-1 off-target 3 F  | 5'-TCAAAATGTACCCAGAAACACAG-3'  | TCCTGGGCAGAACAAAACCTAAAG  | 1.3       | 4MMs [1:3:4:5]  | 13: +174649733       | intergenic        |
| PKU pig sgRNA5-1 off-target 3 R  | 5'-AGAGGTACTGCACAGATGGCA-3'    |                           |           |                 |                      |                   |
| PKU pig sgRNA5-1 off-target 4 F  | 5'-TGACGTAGTCTCACTTTCCTGG-3'   | AAAGTGGCAGAACAAAACCTAGAG  | 1.3       | 4MMs [1:2:3:4]  | 14: +27083917        | intergenic        |
| PKU pig sgRNA5-1 off-target 4 R  | 5'-ATTCTCCAAACGCCTTCCTC-3'     |                           |           |                 |                      |                   |
| PKU pig sgRNA5-1 off-target 5 F  | 5'-GTTCATCAACCAATCCACACCC-3'   | GTTTTGCAAGAACAAAACCTAAAG  | 0.9       | 4MMs [2:4:7:8]  | 6: -110017647        | ZNF521            |
| PKU pig sgRNA5-1 off-target 5 R  | 5'-GTCTCATTCCAATCCTGACACC-3'   |                           |           |                 |                      |                   |
| PKU pig sgRNA5-1 off-target 6 F  | 5'-ATGCTGATGAACACTGGAAGGA-3'   | CGGATGCCAGAACAAAACCTACAG  | 0.9       | 4MMs [1:2:3:7]  | 13: -98605057        | MFS1              |
| PKU pig sgRNA5-1 off-target 6 R  | 5'-GTAGAAGGCTGGAATTAGAGG-3'    |                           |           |                 |                      |                   |
| PKU pig sgRNA5-1 off-target 7 F  | 5'-AGTTGGTGGGTATTGGTGAGG-3'    | GATCTAGAAGAACAAAACCTAAAG  | 0.8       | 4MMs [2:4:6:8]  | 6: +105755628        | intergenic        |
| PKU pig sgRNA5-1 off-target 7 R  | 5'-AAACATAGGTATCAGAGGAAGGT-3'  |                           |           |                 |                      |                   |
| PKU pig sgRNA5-1 off-target 8 F  | 5'-TTTGTTTCTCCTCTCCAGC-3'      | TCAATGCCAGAGAAAACCTAAAG   | 0.4       | 4MMs [1:3:7:13] | 8: +109168408        | CAMK2D            |
| PKU pig sgRNA5-1 off-target 8 R  | 5'-TCTCCTAGCCTCACATTCAGTC-3'   |                           |           |                 |                      |                   |
| PKU pig sgRNA6-2 off-target 1 F  | 5'-CCAAACTAGCCCCATGAACAG-3'    | AGCTCCCTCCATCCAAGAAAAGG   | 1.4       | 4MMs [1:2:5:8]  | 1: +200728346        | intergenic        |
| PKU pig sgRNA6-2 off-target 1 R  | 5'-CTTCTGTGCCAACCTCATTGC-3'    |                           |           |                 |                      |                   |
| PKU pig sgRNA6-2 off-target 2 F  | 5'-CATCCTTCCCCTCCTCACTGC-3'    | GGACACCACCATCCAAGAAAAGG   | 1.3       | 4MMs [2:3:4:8]  | 11: -78854769        | GAS6              |
| PKU pig sgRNA6-2 off-target 2 R  | 5'-GTACCCCTCGTCCCACATTCC-3'    |                           |           |                 |                      |                   |
| PKU pig sgRNA6-2 off-target 3 F  | 5'-GAGTTTCTGTGTCTCGTGA-3'      | GTATCCCCCAATCCAAGAAAAGG   | 1.3       | 4MMs [3:5:8:10] | 9: -7171086          | PDE2A             |
| PKU pig sgRNA6-2 off-target 3 R  | 5'-CCAAGTTTCCCTTCCCATGGCC-3'   |                           |           |                 |                      |                   |
| PKU pig sgRNA6-2 off-target 4 F  | 5'-GAACCTAACCTCGGACGTGA-3'     | GTCTGCTGTCATCCAAGAAAAGG   | 1         | 3MMs [5:7:9]    | 7: +3617295          | intergenic        |
| PKU pig sgRNA6-2 off-target 4 R  | 5'-GGTCCCCTATGAAAAGTCCAC-3'    |                           |           |                 |                      |                   |
| PKU pig sgRNA6-2 off-target 5 F  | 5'-TAACGATTACTGTATGCTTGC-3'    | TTCATCTGCCATCCAAGAAAAGG   | 0.9       | 4MMs [1:4:5:7]  | 9: +28289522         | MAML2             |
| PKU pig sgRNA6-2 off-target 5 R  | 5'-ATCTGTACACTCCCTAGCATCC-3'   |                           |           |                 |                      |                   |
| PKU pig sgRNA6-2 off-target 6 F  | 5'-ACAGGAGAAGAGGGACCTTC-3'     | GGCCACGCCATCCAAGAAAAGG    | 0.9       | 4MMs [2:4:7:8]  | 7: -22858953         | ENSSSCG0000001229 |
| PKU pig sgRNA6-2 off-target 6 R  | 5'-TCTGTGTGGGGAGTAACGT-3'      |                           |           |                 |                      |                   |
| PKU pig sgRNA6-2 off-target 7 F  | 5'-AGGTTTATTAACCTGGGGAGTC-3'   | GTCTCCCGCAATCCAAGAAAAGG   | 0.9       | 3MMs [5:10:19]  | 4: +85434777         | LMX1A             |
| PKU pig sgRNA6-2 off-target 7 R  | 5'-GTGGTAACTAGAGGAGGAAAAGG-3'  |                           |           |                 |                      |                   |
| PKU pig sgRNA6-2 off-target 8 F  | 5'-GCTGGACATGAATGAGTTGAC-3'    | GGCTTCCTCCAACCAAGAAAAGG   | 0.7       | 4MMs [2:5:8:12] | 2: +61069006         | CHERP             |
| PKU pig sgRNA6-2 off-target 8 R  | 5'-GATCAAGTAGATGAGGTGCAGC-3'   |                           |           |                 |                      |                   |
| PKU pig sgRNA6-2 off-target 9 F  | 5'-CCCATTTTCTCTGCTTGGCC-3'     | GCCTCCAGGCATCCAAGAAAAGG   | 0.6       | 4MMs [2:5:7:9]  | 14: +86614855        | GRID1             |
| PKU pig sgRNA6-2 off-target 9 R  | 5'-CAATCCACATGCTGATGCTGG-3'    |                           |           |                 |                      |                   |
| PKU pig sgRNA6-2 off-target 10 F | 5'-AGTATACATGGACATCTACTGCA-3'  | GTTTAAATCCATCCAAGAAAAGG   | 0.5       | 4MMs [3:6:7:8]  | 1: -47850261         | intergenic        |
| PKU pig sgRNA6-2 off-target 10 R | 5'-CTGTGGTATAGTCTCATATGGAG-3'  |                           |           |                 |                      |                   |
| PKUofftarget6-2_3seq             | 5'-TGGACCCAGGTCCAGAAC-3'       | n/a                       | n/a       | n/a             | n/a                  |                   |
| PKUofftarget6-2_10seq            | 5'-GTAGTTATTTAATTGTGC-3'       | n/a                       | n/a       | n/a             | n/a                  |                   |
| PKUofftarget6-2_3seq(2)          | 5'-CCCCAGGAGGCTTAGAGA-3'       | n/a                       | n/a       | n/a             | n/a                  |                   |

**Supplemental Table S10B. PAH genomic and RT-PCR primers.**

| PAH PCR Primer                    | Primer Sequence                  |
|-----------------------------------|----------------------------------|
| pig PAH ex 2 RT-PCR F             | 5' -TCCAGTCAAGATGGTTCCATA-3'     |
| pig PAH ex 3 RT-PCR R             | 5' -TCTGACAGAGTAGGCATGCTG-3'     |
| pig PAH ex 3 RT-PCR F             | 5' -CAGCATGCCTACTCTGTGTCAGA-3'   |
| pig PAH ex 3 RT-PCR R             | 5' -CCGGGAGAGCTCGTGCACG-3'       |
| pig PAH intron 5 F                | 5' -CAAAACATGTAGTTTAAACAAGCTG-3' |
| pig PAH intron 5 R                | 5' -CACCTCACTCAGAGCACCAG-3'      |
| pig PAH intron 6 F                | 5' -GAAGAAAGTAAATTGAGGCCAAG-3'   |
| pig PAH intron 6 R                | 5' -GTACTTTTCAGGATCATGGAAATG-3'  |
| pig PAH exon 5 F                  | 5' -CGAACAAGACGGAAGTACTTTG-3'    |
| pig PAH exon 7 R                  | 5' -GAAATCCCGAGACGAAAGCAG-3'     |
| pig PAH inversion R               | 5' -AAGTAAATTGAGGCCAAGGTGC-3'    |
| pig PAH intron 5 R                | 5' -CCAGTATGGGAATTCACCTTACC-3'   |
| pig PAH intron 5 R                | 5' -AATGCATGGTAGGTCTAAGATC-3'    |
| pig PAH intron 5 F                | 5' -CTCTTAGATGGTTTTCAAAGG-3'     |
| pig PAH int5 LR-PCR F             | 5' -GAGTAGTTGCAGCACAGGTGG-3'     |
| pig PAH int6 LR-PCR R             | 5' -GTCTCTTGGCACAACAGCAC-3'      |
| pig PAH int5 LR-PCR F2            | 5' -CTATTGAGTCATAGCATCACGG-3'    |
| Pig PAH exon 6 STS F              | 5' -ACGCCTGCTACGAGTACAATC-3'     |
| Pig PAH exon 6 STS R              | 5' -AGATGTGGACTCACACTGCAG-3'     |
| Pig PAH exon 7 STS F              | 5' -TAGCACTGCCCTGCCTCAG-3'       |
| Pig PAH exon 10 STS F             | 5' -CAGATTTACTGGTTTACTGTGG-3'    |
| Pig PAH exon 10 STS R             | 5' -ATTCACCAAAGGATGACAGGAG-3'    |
| Pig PAH exon 13 STS F             | 5' -GCAGAACCTCATCTGTCAGC-3'      |
| Pig PAH exon 13 STS R             | 5' -TACTTGTTGATCCTCCATCTTG-3'    |
| Pig PAH intron 5 STS F            | 5' -GACACTGTGTACCCTGTTAG-3'      |
| Pig PAH intron 5 STS R            | 5' -TTTGAAAACCATCGAAAGTTCC-3'    |
| pig PAH intron 5 F                | 5' -AGTGGTGCATCTCTAGGCAAG-3'     |
| pig PAH exon 13 (3'-UTR) R        | 5' -CAGTAATTAGAATCACAGTCCC-3'    |
| pig PAH intron 3 R                | 5' -GGCACCTTTAGACACCCAAATC-3'    |
| pig PAH intron 6 F                | 5' -CTCGTCTCAAATGCTGCAACG-3'     |
| Pig PAH intron 7 F                | 5' -TGCACAGAAAGCCTGAGTCTG-3'     |
| Pig PAH exon 8 R                  | 5' -GTACATGTCCCAACAGCTCATG-3'    |
| Pig PAH intron 8 F                | 5' -CTGTGCCAGTGACTGTCTTTC-3'     |
| Pig PAH exon 9 R                  | 5' -TTCTCAATATACTCGTCAGGTGC-3'   |
| pig PAH intron 5 breakpoint F     | 5' -GAACACAGCTCCCTCTTAGATG-3'    |
| pig PAH intron 6 breakpoint R     | 5' -CATGGAAATGGCAAATCCACAG-3'    |
| pig PAH Intron 5 ddPCR STS F      | 5' -ATGATTCTAAGGTAAACAGCCTC-3'   |
| pig PAH Intron 5 ddPCR STS R      | 5' -CATCTAAGAGGGAGCTGTGTTC-3'    |
| pig PAH intron 5 F-2              | 5' -TGTTCAGAACACAGCTCCCTC-3'     |
| pig PAH intron 6 R-2              | 5' -ACCCAGACTTGTAGTCACTTTG-3'    |
| pig PAH intron 5 del-breakpoint F | 5' -CTTGTCTTGCTTTCAGTTCTTC-3'    |
| pig PAH intron 5 del-breakpoint R | 5' -CACAGAACACGCCACTTAT-3'       |

**Supplemental Table S10C. Other PCR primers.**

| Other PCR Primer                                | Primer Sequence                |
|-------------------------------------------------|--------------------------------|
| pig GAPDH qRT-PCR F                             | 5' -ATCCTGGGCTACACTGAGGAC-3'   |
| pig GAPDH qRT-PCR R                             | 5' -CTTGACGAAGTGGTCGTTGAGG-3'  |
| pig GAPDH control F ddPCR                       | 5' -CCGCGATCTAATGTTCTCTTTC-3'  |
| pig GAPDH control R ddPCR                       | 5' -TTCACCTCCGACCTTCACCATC-3'  |
| pig IGF1 exon 1a STS F                          | 5' -TTCAGAGCAGATAGAGCCTGC-3'   |
| pig IGF1 exon 1a STS R                          | 5' -AATCCAGGGAGATGGGAGATG-3'   |
| pig IGF1 exon 1b STS F                          | 5' -TGACTCAAATCCCAGCTGTGC-3'   |
| pig IGF1 exon 1b STS R                          | 5' -AGCATCTAGTTACATTGGGAC-3'   |
| pig PAH-IGF1 intergenic CpG1 F STS F            | 5' -GTTTACTCAACAGAACGCTGTC-3'  |
| pig PAH-IGF1 intergenic CpG1 F STS R            | 5' -TTCTCAGTTGGCTCTGTACATG-3'  |
| pig PAH-IGF1 intergenic CpG2 F STS F            | 5' -GAAGATGAAGCTAGGTTGATCG-3'  |
| pig PAH-IGF1 intergenic CpG2 F STS R            | 5' -TCAGTAGGATTTCTGAGTTAGTC-3' |
| pig PAH-IGF1 intergenic 1 (R8-9 enhancer) STS F | 5' -GTTGTATGGCGTGAGCTACAG-3'   |
| pig PAH-IGF1 intergenic 1 (R8-9 enhancer) STS R | 5' -GGCAGCCTGTTATTTTACGAG-3'   |
| pig PAH-IGF1 intergenic 2 (R13 enhancer) STS F  | 5' -TACAGATCCAATGGTAGCTCC-3'   |
| pig PAH-IGF1 intergenic 2 (R13 enhancer) STS R  | 5' -TTCACAAGGCGACAGAGCAG-3'    |

**Supplemental Table S10D. *Bbs*I site oligonucleotide cloning adapters for sgRNAs.**

| sgRNA Oligo                            | OligoSequence                     |
|----------------------------------------|-----------------------------------|
| sgRNA pig PAH intron 5-1 sense         | 5' -CACCgGCTATGGCAGAACAAAATA-3'   |
| sgRNA pig PAH intron 5-1 complementary | 5' -AAACTAGTTTTGTTCTGCCATAGCc-3'  |
| sgRNA pig PAH intron 5-2 sense         | 5' -CACCgGGTAAGTGAATTCCCATACT-3'  |
| sgRNA pig PAH intron 5-2 complementary | 5' -AAACAGTATGGGAATTCACCTACCc-3'  |
| sgRNA pig PAH intron 6-1 sense         | 5' -CACCgGAGTGCGTTTTGTGCTGATGC-3' |
| sgRNA pig PAH intron 6-1 complementary | 5' -AAACGCATCAGCACAAACGCACTCc-3'  |
| sgRNA pig PAH intron 6-2 sense         | 5' -CACCgGTCTACCGCCATCCAAGAAA-3'  |
| sgRNA pig PAH intron 6-2 complementary | 5' -AAACTTTCTTGGATGGCGGTAGACc-3'  |





conserved in other mammalian species including human. **(B)** The pig phenylalanine-4-hydroxylase (PAH) polypeptide sequence is highly conserved with other vertebrate species. Variants in pig breeds are highlighted in blue shade (V385 or L385 and S393 or N393). **(C)** Expression of *PAH* in Göttingen minipig tissues. (left) RT-PCR expression profile of *PAH* exon 2-3 across multiple tissues shows highest levels in liver, heart and kidney; (right) RT-PCR detection of *PAH* exon 2-7 and exon 3-7 confirms high expression in liver and moderate expression in kidney. **(D)** Genomic PCR in a subpanel of five pig-hamster somatic cell hybrid (SCH) lines indicates the mapping (blue arrow) of *PAH* to the long arm of *Sus scrofa* chromosome 5 (SSC5q). Black vertical bars indicate the SSC5 segment present in each SCH line, with dashed lines indicating the absence of SSC5 in those SCH lines. CHO-K1 is a Chinese hamster ovary control cell line.

**Supplemental Figure S2. *PAH* open reading frame and translated protein products in (A) wild-type, (B) exon 6 deletion, (C) and exon 6-7 deletion mutants.**

**A. Wild-Type:**

1 ATGTCAGCGG CGGTCCTGGA GAACGGAGGC GGGGGCCGCA AACTCAGCGA CTGGGGACAG  
M S A A V L E N G G G G R K L S D W G Q

61 GAAACAAGCT ATATTGAAGA CAGCTCCAGT CAAGATGGTT CCATATCACT GATCTTCTCA  
E T S Y I E D S S S Q D G S I S L I F S

121 CTCAAAGAAG AAGTTGGTGC GCTGGCCAAA GTC'TGCGT' TATTGAGGA GAATGGTATA  
L K E E V G A L A K V L R L F E E N G I

181 AACCTGACTC ACATTGAATC CCGACCTTCG CGTTTAAAGA AAGATGAGTA TGAGTTTTTC  
N L T H I E S R P S R L K K D E Y E F F

241 ACCCACCTGG ATAAAGGCGAG CATGCCTACT CTGTGAGACA TCATCAAGAT CTTGAGACAT  
T H L D K G S M P T L S D I I K I L R H

301 GACATTGGCG CCACCGTGCA CGAGCTCTCC CGGGACAAGA AGAAAGACAC AGTGCCTGG  
D I G A T V H E L S R D K K K D T V P W

361 TTCCCAAAA CCATTCAAGA GCTGGACAGA TTTGCCAATC AGATTCTCAG CTACGGAGCG  
F P K T I Q E L D R F A N Q I L S Y G A

421 GAACTGGATG CAGATCACCC TGGTTTTAAA GATCCTGTGT ACCGAACAAG ACGGAAGTAC  
E L D A D H P G F K D P V Y R T R R K Y

481 TTTGCTGACA TTGCCTACAA CTATCGACAT GGGCAGCCCA TCCCCCGAGT GGAGTACACA  
F A D I A Y N Y R H G Q P I P R V E Y T

541 GAGGAAGAGA AGAAAACGTG GGGGACGGTG TTCAAGAACC TGAAGTCCTT GTATCAAACC  
E E E K K T W G T V F K N L K S L Y Q T

601 CACGCCTGCT ACGAGTACAA TCACATTTTC CCACTTCTGG AAAAGTACTG TGGTTTCTGC  
H A C Y E Y N H I F P L L E K Y C G F C

661 GAAGATAATA TTCCCCAGCT GGAAGAAGTT TCTCAGTTTC TGCAGTCTTG CACCGGTTTC  
E D N I P Q L E E V S Q F L Q S C T G F

721 CGCCTCCGAC CTGTGGCCGG CCTGCTTTCG TCTCGGGATT TCCTGGGTGG CCTGGCTTTC  
R L R P V A G L L S S R D F L G G L A F

781 CGAGTCTTCC ACTGCACTCA GTACATCAGA CACGCGTCCA AGCCCATGTA TACACCTGAA  
R V F H C T Q Y I R H A S K P M Y T P E

841 CCTGACATCT GCCATGAGCT GTTGGGACAT GTACCCTTGT TTTCAGATCG CAGCTTTGCC  
P D I C H E L L G H V P L F S D R S F A

901 CAGTTTTTCC AGGAAATCGG CCTCGCTCT GTGGGGGCAC CTGACGAGTA TATTGAGAAA  
Q F S Q E I G L A S V G A P D E Y I E K

961 CTTGCAACAA TTTACTGGTT TACTGTGGAG TTTGGGCTCT GCAAGCAAGA AGACTCCATA  
L A T I Y W F T V E F G L C K Q E D S I

1021 AAGGCATATG GTGCTGGGCT CCTGTATCCT TTTGGTGAAT TACAGTATG CTTGTCAGGT  
K A Y G A G L L S S F G E L Q Y C L S G

1081 GAGCCAAAGC TCCTCACTCT GGAAGTGGAG AAGACAGCTG TCCAGGAGTA CACAGTCAGG  
E P K L L T L E L E K T A V Q E Y T V T

1141 GAGTTCAGC CCGTGTACTA CGTGGCCGAG AGTTTCAATG ATGCCAAGGA GAAAGTGAGG  
E F Q P V Y Y V A E S F N D A K E K V R

1201 AACTTTGCTG CCACAATTC TCGGCCTTC TCAGTTCGTT ATGACCCATA CACCCAAGG  
N F A A T I P R P F S V R Y D P Y T Q R

1261 ATTGAGGCT TGGACAACAC CCAGCAGCTT AAGATTCTGG CTGACTCCAT CAACGGTGAA  
I E V L D N T Q Q L K I L A D S I N G E

1321 GTTGGAATCC TTTGCAATGC CCTCCAGAAA TTAAGTGA  
V G I L C N A L Q K L K \*

## Supplemental Figure S2 (cont.)

### B. Exon 6 Deletion:

1 ATGTCAGCGG CGGTCCTGGA GAACGGAGGC GGGGGCCGCA AACTCAGCGA CTGGGGACAG  
M S A A V L E N G G G G R K L S D W G Q

61 GAAACAAGCT ATATTGAAGA CAGCTCCAGT CAAGATGGTT CCATATCACT GATCTTCTCA  
E T S Y I E D S S S Q D G S I S L I F S

121 CTCAAAGAAG AAGTTGGTGC GCTGGCCAAA GTCTTGC GTT TATTGAGGA GAATGGTATA  
L K E E V G A L A K V L R L F E E N G I

181 AACCTGACTC ACATTGAATC CCGACCTTCG CGTTTAAAGA AAGATGAGTA TGAGTTTTTC  
N L T H I E S R P S R L K K D E Y E F F

241 ACCCACCTGG ATAAAGGCAG CATGCCTACT CTGTCAGACA TCATCAAGAT CTTGAGACAT  
T H L D K G S M P T L S D I I K I L R H

301 GACATTGGCG CCACCGTGCA CGAGCTCTCC CGGGACAAGA AGAAAGACAC AGTGCCCTGG  
D I G A T V H E L S R D K K K D T V P W

361 TTCCCAAAA CCATTCAAGA GCTGGACAGA TTTGCCAATC AGATTCTCAG CTACGGAGCG  
F P K T I Q E L D R F A N Q I L S Y G A

421 GAACTGGATG CAGATCACCC TGGTTTTAAA GATCCTGTGT ACCGAACAAG ACGGAAGTAC  
E L D A D H P G F K D P V Y R T R R K Y

481 TTTGCTGACA TTGCCTACAA CTATCGACAC  TTGCACCGGT TTCCGCCTCC GACCTGTGGC  
F A D I A Y N Y R H L H R F P P P T C G

541 CGGCCTGCTT TCGTCTCGGG ATTTCTGGG TGGCCTGGCT TTCCGAGTCT TCCACTGCAC  
R P A F V S G F P G W P G F P S L P L H

601 TCAGTACATC AGACACGCGT CCAAGCCCAT GTATACACCT GA  
S V H Q T R V Q A H V Y T \*

### C. Exon 6-7 Deletion:

1 ATGTCAGCGG CGGTCCTGGA GAACGGAGGC GGGGGCCGCA AACTCAGCGA CTGGGGACAG  
M S A A V L E N G G G G R K L S D W G Q

61 GAAACAAGCT ATATTGAAGA CAGCTCCAGT CAAGATGGTT CCATATCACT GATCTTCTCA  
E T S Y I E D S S S Q D G S I S L I F S

121 CTCAAAGAAG AAGTTGGTGC GCTGGCCAAA GTCTTGC GTT TATTGAGGA GAATGGTATA  
L K E E V G A L A K V L R L F E E N G I

181 AACCTGACTC ACATTGAATC CCGACCTTCG CGTTTAAAGA AAGATGAGTA TGAGTTTTTC  
N L T H I E S R P S R L K K D E Y E F F

241 ACCCACCTGG ATAAAGGCAG CATGCCTACT CTGTCAGACA TCATCAAGAT CTTGAGACAT  
T H L D K G S M P T L S D I I K I L R H

301 GACATTGGCG CCACCGTGCA CGAGCTCTCC CGGGACAAGA AGAAAGACAC AGTGCCCTGG  
D I G A T V H E L S R D K K K D T V P W

361 TTCCCAAAA CCATTCAAGA GCTGGACAGA TTTGCCAATC AGATTCTCAG CTACGGAGCG  
F P K T I Q E L D R F A N Q I L S Y G A

421 GAACTGGATG CAGATCACCC TGGTTTTAAA GATCCTGTGT ACCGAACAAG ACGGAAGTAC  
E L D A D H P G F K D P V Y R T R R K Y

481 TTTGCTGACA TTGCCTACAA CTATCGACAT  GACATCTGCC ATGAGCTGTT GGGACATGTA  
F A D I A Y N Y R H D I C H E L L G H V

541 CCCTTGTTTT CAGATCGCAG CTTTGGCCAG TTTTCCAGG AAATCGGCCT CGCCTCTGTG  
P L F S D R S F A Q F S Q E I G L A S V

601 GGGCACCTG ACGAGTATAT TGAGAAACTT GCAACAATTT ACTGGTTTAC TGTGGAGTTT  
G A P D E Y I E K L A T I Y W F T V E F

## Supplemental Figure S2 (cont.)

```
660 GGGCTCTGCA AGCAAGAAGA CTCCATAAAG GCATATGGTG CTGGGCTCCT GTCATCCTTT
    G L C K Q E D S I K A Y G A G L L S S F
720 GGTGAATTAC AGTATTGCTT GTCAGGTGAG CCAAAGCTCC TCACTCTGGA ACTGGAGAAG
    G E L Q Y C L S G E P K L L T L E L E K
781 ACAGCTGTCC AGGAGTACAC AGTCACGGAG TTCCAGCCCG TGTACTACGT GGCCGAGAGT
    T A V Q E Y T V T E F Q P V Y Y V A E S
841 TTCAATGATG CCAAGGAGAA AGTGAGGAAC TTTGCTGCCA CAATTCCTCG GCCCTTCTCA
    F N D A K E K V R N F A A T I P R P F S
901 GTTCGTTATG ACCCATAAC CCAAAGGATT GAGGTCTTGG ACAACACCCA GCAGCTTAAG
    V R Y D P Y T Q R I E V L D N T Q Q L K
961 ATTCTGGCTG ACTCCATCAA CGGTGAAGTT GGAATCCTTT GCAATGCCCTC CAGAAATTA
    I L A D S I N G E V G I L C N A L Q K L
1021 AAGTGA
    K *
```

**Supplemental Figure S2. *PAH* open reading frame and translated protein products in (A) wild-type, (B) exon 6 deletion, (C) and exon 6-7 deletion mutants.** Translation initiation and termination codons are underlined. With the exon 6 deletion there would be early termination codon usage due to a frameshift whereas the exon 6-7 deletion is in-frame and translation would lead to a shortened polypeptide sequence utilizing the same terminator as for the wild-type *PAH* transcripts. The open reading frame (ORF) nucleotide position is given on the left and the amino acid single letter code is written below with an asterisk (\*) for stop codons. A red arrowhead indicates deletion of exon 6 and resulting out-of-frame translation and early termination (red amino acid sequence), while a green arrowhead indicates the site of exon 6-7 deletion that results in ablation of 111 amino acid residues in the PAH catalytic domain.



## Supplemental Figure S3 (cont.)

### E

```
Intron 5                               5-1   6-1   Intron 6 RevComp
pInv3  ACAGGTTCAAGATCTGGGGGCAGGTCCAACACATGTACTTTAACAAGTGC CCGTAG -TCAGCACAACCGCACTCACGCGCACCTTGGCCTCAATTTACTT
pInv2  ACAGGTTCAAGATCTGGGGGCAGGTCCAACACATGTACTTTAACAAGTGC CCGTAG -TCAGCACAACCGCACTCACGCGCACCTTGGCCTCAATTTACTT
pInv5  ACAGGTTCAAGATCTGGGGGCAGGTCCAACACATGTACTTTAACAAGTGC CCGTAG -TCAGCACAACCGCACTCACGCGCACCTTGGCCTCAATTTACTT
pInv4  ACAGGTTCAAGATCTGGGGGCAGGTCCAACACATGTACTTTAACAAGTGC CCGTAG -TCAGCACAACCGCACTCACGCGCACCTTGGCCTCAATTTACTT
Duroc  ACAGGTTCAAGATCTGGGGGCAGGTCCAACACATGTACTTTAACAAGTGC CCGTAG -TCAGCACAACCGCACTCACGCGCACCTTGGCCTCAATTTACTT
```

### F

```
Intron 5                               5-2   6-1   Intron 6 RevComp
pInv4  ATACCTGCTACTTGACATATTTATGTTACAGGCCCTTGAA GGTAAAGTGAATTCCCAT -TCAGCACNAACGCNCTCACGCGCACCTTGGCCTCAATTTACTT
pInv3  ATACCTGCTACTTGACATATTTATGTTACAGGCCCTTGAA GGTAAAGTGAATTCCCAT -TCAGCACAACCGCACTCACGCGCACCTTGGCCTCAATTTACTT
pInv1  ATACCTGCTACTTGACATATTTATGTTACAGGCCCTTGAA GGTAAAGTGAATTCCCAT -TCAGCACAACCGCACTCACGCGCACCTTGGCCTCAATTTACTT
pInv5  ATACCTGCTACTTGACATATTTATGTTACAGGCCCTTGAA GGTAAAGTGAATTCCCAT -TCAGCACAACCGCACTCACGCGCACCTTGGCCTCAATTTACTT
pInv2  ATACCTGCTACTTGACATATTTATGTTACAGGCCCTTGAA GGTAAAGTGAATTCCCAT -TCAGCACAACCGCACTCACGCGCACCTTGGCCTCAATTTACTT
Duroc  ATACCTGCTACTTGACATATTTATGTTACAGGCCCTTGAA GGTAAAGTGAATTCCCAT /TCAGCACAACCGCACTCACGCGCACCTTGGCCTCAATTTACTT
```

### G

```
Intron 5                               5-1   6-2   Intron 6 RevComp
pInv1  CAAGATCTGGGGGCAGGTCCAACACATGTACTTTAACAAGTGC CCGTAG -CTTGGATGGCGGTAGACTAACCGTGGGGGCCTGAGGGGAGGCAGAGCCCA
pInv3  CAAGATCTGGGGGCAGGTCCAACACATGTACTTTAACAAGTGC CCGTAG -CTTGGATGGCGGTAGACTAACCGTGGGGGCCTGAGGGGAGGCAGAGCCCA
pInv4  CAAGATCTGGGGGCAGGTCCAACACATGTACTTTAACAAGTGC CCGTAG -CTTGGATGGCGGTAGACTAACCGTGGGGGCCTGAGGGGAGGCAGAGCCCA
pInv2  CAAGATCTGGGGGCAGGTCCAACACATGTACTTTAACAAGTGC CCGTAG -CTTGGATGGCGGTAGACTAACCGTGGGGGCCTGAGGGGAGGCAGAGCCCA
Duroc  CAAGATCTGGGGGCAGGTCCAACACATGTACTTTAACAAGTGC CCGTAG /CTTGGATGGCGGTAGACTAACCGTGGGGGCCTGAGGGGAGGCAGAGCCCA
```

### H

```
Intron 5                               5-2   6-2   Intron 6 RevComp
pInv1  CTACTTGACATATTTATGTTACAGGCCCTTGAA GGTAAAGTGAATTCCCAT -CTTGGATGGCGGTAGACTAACCGTGGGGGCCTGAGGGGAGGCAGAGCCCA
pInv2  CTACTTGACATATTTATGTTACAGGCCCTTGAA GGTAAAGTGAATTCCCAT -CTTGGATGGCGGTAGACTAACCGTGGGGGCCTGAGGGGAGGCAGAGCCCA
pInv4  CTACTTGACATATTTATGTTACAGGCCCTTGAA GGTAAAGTGAATTCCCAT -CTTGGATGGCGGTAGACTAACCGTGGGGGCCTGAGGGGAGGCAGAGCCCA
pInv3  CTACTTGACATATTTATGTTACAGGCCCTTGAA GGTAAAGTGAATTCCCAT -TTGGATGGCGGTAGACTAACCGTGGGGGCCTGAGGGGAGGCAGAGCCCA
Duroc  CTACTTGACATATTTATGTTACAGGCCCTTGAA GGTAAAGTGAATTCCCAT /CTTGGATGGCGGTAGACTAACCGTGGGGGCCTGAGGGGAGGCAGAGCCCA
```

### I

```
Intron 5 RevComp                       5-1   6-1   Intron 6
dInv2  CTAAGATCCAGATCCATTTACCTGGCATCTCCG GCTATGGCAGAA-----GACGGATTCTCCAGGAAAACCAGAATTTCACTGTTTCACTG
dInv3  CTAAGATCCAGATCCATTTACCTGGCATCTCCG GCTATGGCAGAACAGAA--TGCAGGAAGACGGATTCTCCAGGAAAACCAGAATTTCACTGTTTCACTG
dInv5  CTAAGATCCAGATCCATTTACCTGGCATCTCCG GCTATGGCAGAACAAAAATGTCAGGAAGACGGATTCTCCAGGAAAACCAGAATTTCACTGTTTCACTG
dInv4  CTAAGATCCAGATCCATTTACCTGGCATCTCCG GCTATGGCAGAACAAAA--TGCAGGAAGACGGATTCTCCAGGAAAACCAGAATTTCACTGTTTCACTG
dInv1  CTAAGATCCAGATCCATTTACCTGGCATCTCCG GCTATGGCAGAACAAAAATGTCAGGAAGACGGATTCTCCAGGAAAACCAGAATTTCACTGTTTCACTG
Duroc  CTAAGATCCAGATCCATTTACCTGGCATCTCCG GCTATGGCAGAACAAAA//TGCAGGAAGACGGATTCTCCAGGAAAACCAGAATTTCACTGTTTCACTG
```

### J

```
Intron 5 RevComp                       5-2   6-1   Intron 6
dInv4  AACTCCTCACTTGGCTTTTCTGCTCTCCTATTTCCATTCTTTACCCAGT--GCAGGAAGACGGATTCTCCAGGAAAACCAGAATTTCACTGTTTCACTG
dInv3  AACTCCTCACTTGGCTTTTCTGCTCTCCTATTTCCATTCTTTACCCAGT--TGCAGGAAGACGGATTCTCCAGGAAAACCAGAATTTCACTGTTTCACTG
dInv9  AACTCCTCACTTGGCTTTTCTGCTCTCCTATTTCCATTCTTTACCCAGT--TGCAGGAAGACGGATTCTCCAGGAAAACCAGAATTTCACTGTTTCACTG
dInv5  AACTCCTCACTTGGCTTTTCTGCTCTCCTATTTCCATTCTTTACCCAGT--TGCAGGAAGACGGATTCTCCAGGAAAACCAGAATTTCACTGTTTCACTG
dInv1  AACTCCTCACTTGGCTTTTCTGCTCTCCTATTTCCATTCTTTACCCAGT--TGCAGGAAGACGGATTCTCCAGGAAAACCAGAATTTCACTGTTTCACTG
dInv2  AACTCCTCACTTGGCTTTTCTGCTCTCCTATTTCCATTCTTTACCCAGT--TGCAGGAAGACGGATTCTCCAGGAAAACCAGAATTTCACTGTTTCACTG
dInv7  AACTCCTCACTTGGCTTTTCTGCTCTCCTATTTCCATTCTTTACCCAGT--TGCAGGAAGACGGATTCTCCAGGAAAACCAGAATTTCACTGTTTCACTG
dInv8  AACTCCTCACTTGGCTTTTCTGCTCTCCTATTTCCATTCTTTACCCAGT--TGCAGGAAGACGGATTCTCCAGGAAAACCAGAATTTCACTGTTTCACTG
dInv6  AACTCCTCACTTGGCTTTTCTGCTCTCCTATTTCCATTCTTTACCCAGT--TGCAGGAAGACGGATTCTCCAGGAAAACCAGAATTTCACTGTTTCACTG
Duroc  AACTCCTCACTTGGCTTTTCTGCTCTCCTATTTCCATTCTTTACCCAGT//TGCAGGAAGACGGATTCTCCAGGAAAACCAGAATTTCACTGTTTCACTG
```

### K

```
Intron 5 RevComp                       5-1   6-2   Intron 6
dInv3  TCTAANATCCANATNCATTTACCTGGCATCTCCG GCTATGGCANAACAAAA--AAAGGCATTANCTGTGGATTTTGCATTTCCATGATCCTGAAAAGTAC
dInv1  TCTAAGATCCAGATCCATTTACCTGGCATCTCCG GCTATGGCAGAACAAA---GAAAGGCATTAGCTGTGGATTTTGCATTTCCATGATCCTGAAAAGTAC
dInv2  TCTAAGATCCAGATCCATTTACCTGGCATCTCCG GCTATGGCAGAACAAAAAAAAGGCATTAGCTGTGGATTTTGCATTTCCATGATCCTGAAAAGTAC
Duroc  TCTAAGATCCAGATCCATTTACCTGGCATCTCCG GCTATGGCAGAACAAAA//AAAAGGCATTAGCTGTGGATTTTGCATTTCCATGATCCTGAAAAGTAC
```

**Supplemental Figure S3 (cont.)**

**L**

```

                Intron 5 RevComp          5-2    6-2          Intron 6
dInv10  AACTCCTCGCTGGCTTTTCTGCTCTCCTATTTCTATTCTTTAACCAGT--GAAAAGGCATTAGCTGTGGATTTTGCCATTTCCATGATCCTGAAAAGTAC
dInv3   AACTCCTCACTTGGCTTTTCTGCTCTCCTATTTCTATTCTTTAACCAGT-AGAAAAGGCATTAGCTGTGGATTTTGCCATTTCCATGATCCTGAAAAGTAC
dInv9   AACTCCTCACTTGGCTTTTCTGCTCTCCTATTTCTATTCTTTAACCAGTA-----ATTAGCTGTGGATTTTGCCATTTCCATGATCCTGAAAAGTAC
dInv7   AACTCCTCACTTGGCTTTTCTGCTCTCCTATTTCTATTCTTTAACCAGT-----AAGGCATTAGCTGTGGATTTTGCCATTTCCATGATCCTGAAAAGTAC
dInv11  AACTCCTCACTTGGCTTTTCTGCTCTCCTATTTCTATTCTTTAACCAGTAT-AAAAGGCATTAGCTGTGGATTTTGCCATTTCCATGATCCTGAAAAGTAC
dInv8   AACTCCTCACTTGGCTTTTCTGCTCTCCTATTTCTATTCTTTAACCAGT-T-AAAAGGCATTAGCTGTGGATTTTGCCATTTCCATGATCCTGAAAAGTAC
dInv6   AACTCCTCACTTGGCTTTTCTGCTCTCCTATTTCTATTCTTTAACCAGT-AGAAAAGGCATTAGCTGTGGATTTTGCCATTTCCATGATCCTGAAAAGTAC
dInv2   AACTCCTCACTTGGCTTTTCTGCTCTCCTATTTCTATTCTTTAACCAGT-AGAAAAGGCATTAGCTGTGGATTTTGCCATTTCCATGATCCTGAAAAGTAC
dInv1   AACTCCTCACTTGGCTTTTCTGCTCTCCTATTTCTATTCTTTAACCAGT-AGAAAAGGCATTAGCTGTGGATTTTGCCATTTCCATGATCCTGAAAAGTAC
dInv5   AACTCCTCACTTGGCTTTTCTGCTCTCCTATTTCTATTCTTTAACCAGT-AGAAAAGGCATTAGCTGTGGATTTTGCCATTTCCATGATCCTGAAAAGTAC
dInv4   AACTCCTCACTTGGCTTTTCTGCTCTCCTATTTCTATTCTTTAACCAGTA-GAAAAGGCATTAGCTGTGGATTTTGCCATTTCCATGATCCTGAAAAGTAC
Duroc   AACTCCTCACTTGGCTTTTCTGCTCTCCTATTTCTATTCTTTAACCAGT///AAAAGGCATTAGCTGTGGATTTTGCCATTTCCATGATCCTGAAAAGTAC

```

**Supplemental Figure S3. Characterization of *PAH* gene-edited recombinant deletion and**

**inversion breakpoints induced in the SCH cell lines.** Multiple sequence alignments

of recombinant breakpoints derived from transfected SCH18 and SCH19 lines sequenced after

PCR amplification and topo-TA cloning compared to reference Duroc genomic sequence, with

expected breakpoints based on canonical DSB at each PAM -3 position. **(A-D)** Intron 5-6

deletion-breakpoints (see **Fig. 1C**, top panel) generated by CRISPR/Cas9 sgRNA pairs: **(A)**

sgRNA5-1 + sgRNA6-1, **(B)** sgRNA5-2 + sgRNA6-1, **(C)** sgRNA5-1 + sgRNA6-2, and **(D)**

sgRNA5-2 + sgRNA6-2. **(E-H)** Intron 5-6 proximal inversion-breakpoints (see **Fig. 1C**,

middle panel) generated by CRISPR/Cas9 sgRNA pairs: **(E)** sgRNA5-1 + sgRNA6-1, **(F)**

sgRNA5-2 + sgRNA6-1, **(G)** sgRNA5-1 + sgRNA6-2, and **(H)** sgRNA5-2 + sgRNA6-2. **(I-L)**

Intron 5-6 proximal inversion-breakpoints (see **Fig. 1C**, lower panel) generated by CRISPR/

Cas9 sgRNA pairs: **(I)** sgRNA5-1 + sgRNA6-1, **(J)** sgRNA5-2 + sgRNA6-1, **(K)** sgRNA5-1

+ sgRNA6-2, and **(L)** sgRNA5-2 + sgRNA6-2. Key: Blue text, intron 5 sequence (or

reverse complement); purple text, intron 6 sequence (or reverse complement); red text,

ambiguous (either intron 5 or intron 6) or inserted sequence at breakpoint; yellow shade,

proximal sgRNA 5-1 or 5-2 sequence; blue shade, distal sgRNA 6-1 or 6-2 sequence; gray

shade, PAM sequences for each sgRNA target; Backslash (“/”) character, expected breakpoint in

reference sequence.

**Supplemental Figure S4. Fluorescence *in situ* hybridization (FISH) mapping of the pig *PAH-IGF1* locus.**

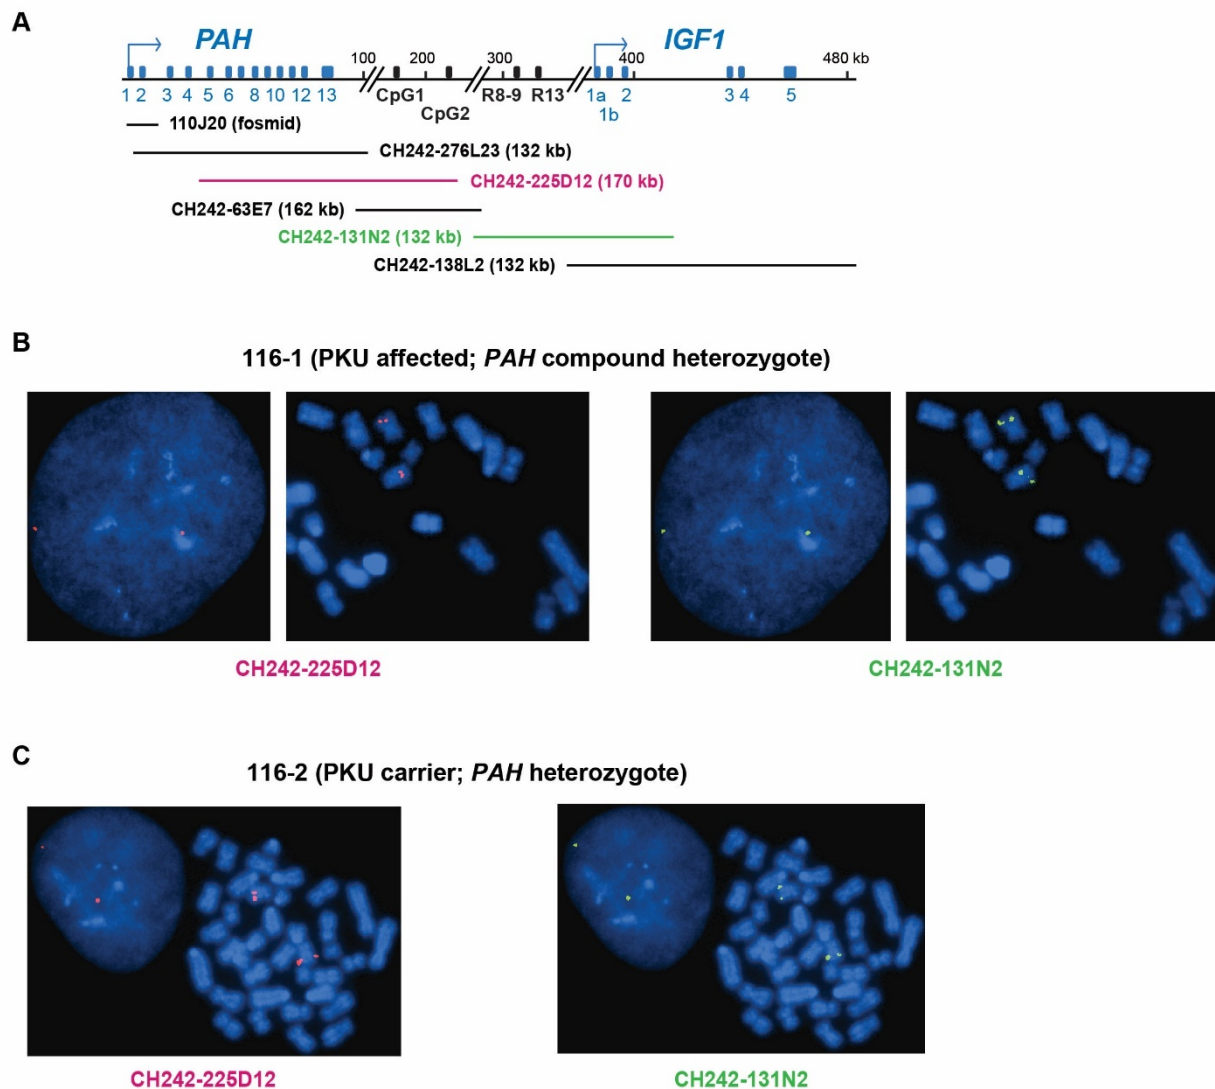

**Supplemental Figure S4. Fluorescence *in situ* hybridization (FISH) mapping of the pig *PAH-IGF1* locus.** (A) BAC contig and gene map of the *PAH-IGF1* interval. Sequence tagged sites (STS) in the intergenic region used for PCR amplicons are indicated by black rectangles: CpG1 and CpG2 are CpG-rich sequence elements, while R8-9 and R13 are within a subset of *IGF1*-enhancer elements (*1*). The two BACs used for FISH are color coded. (B-C) Representative interphase (left) and metaphase (right) FISH images for CH242-225D12 and CH242-131N2 using fibroblasts from



(B) 116-1 (PKU affected) and (C) 116-2 (PKU heterozygote), demonstrating that both alleles of each BAC clone are intact in cell lines from each of the founder PKU pigs. 1000x total magnification.

**Supplemental Figure S5. Representative 7-month old pig brain MRI images from control and PKU affected animal 116-1.**

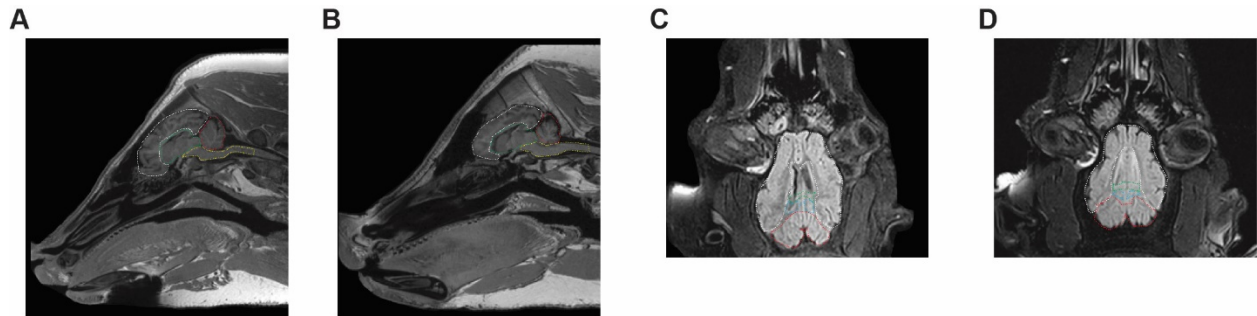

**Supplemental Figure S5. Representative 7-month old pig brain MRI images from control and PKU affected animal 116-1. (A,B) T1 weighted sagittal view of (A) control and (B) affected PKU pigs. (C,D) T2 weighted axial view of (C) control and (D) PKU affected pig. Key: dashed lines show segmentation for cortex (white), diencephalon (green), hippocampus (blue), cerebellum (red) and brainstem (yellow).**

**Supplemental Figure S6. Mapping of *PAH* deletion extents by genomic DNA droplet-digital PCR (ddPCR) in the pig PKU founder animals.**

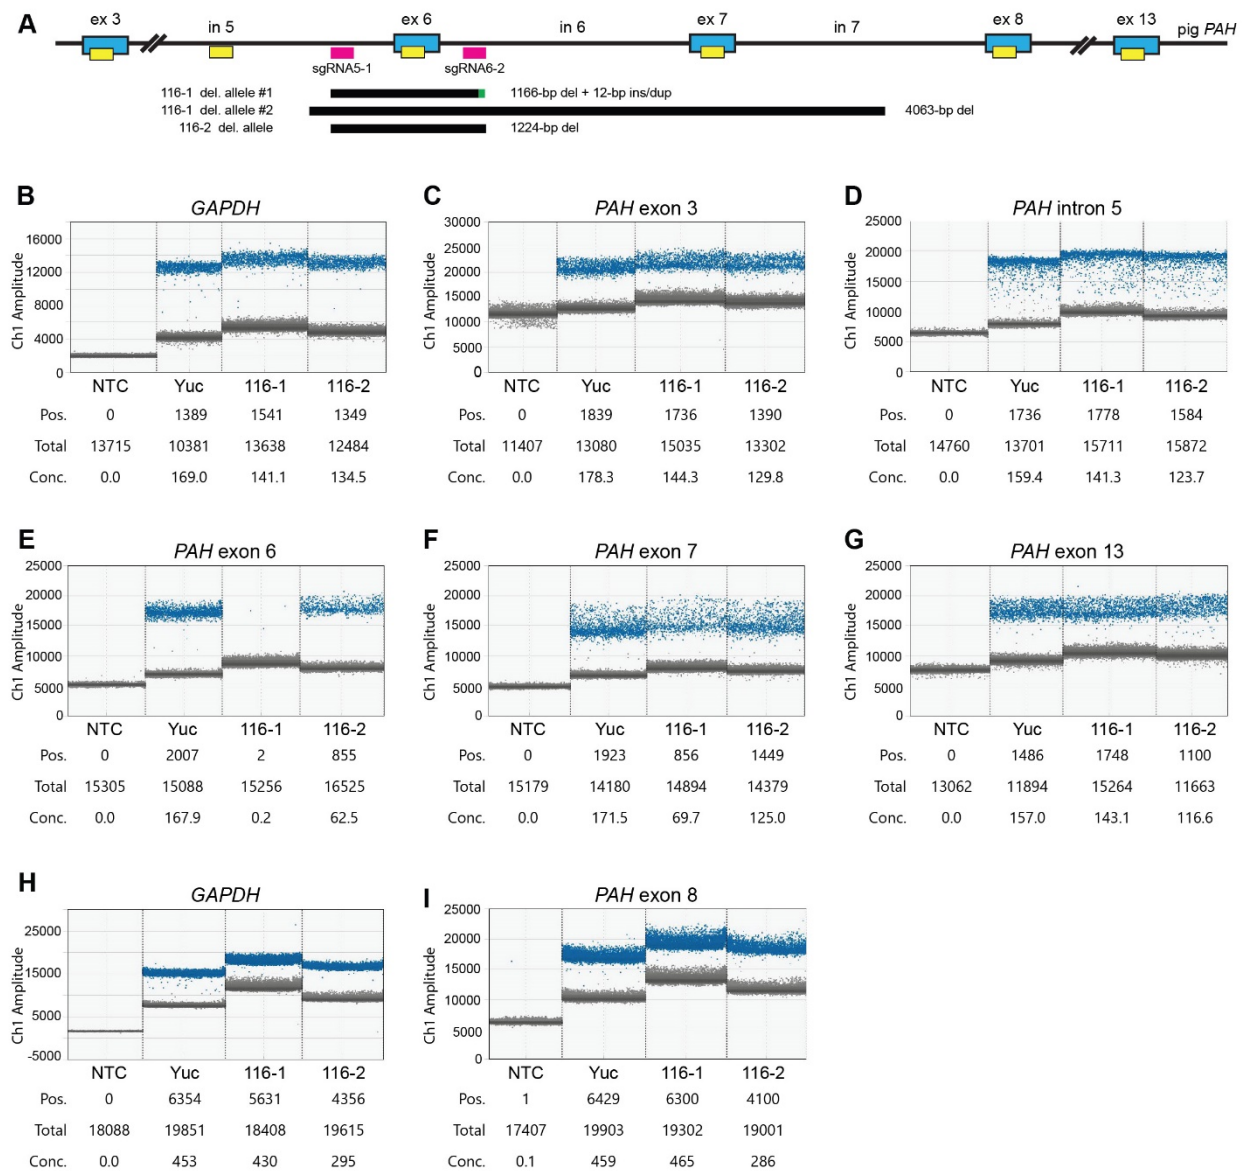

**Supplemental Figure S6. Mapping of *PAH* deletion extents by genomic DNA droplet-digital PCR (ddPCR) in the pig PKU founder animals. (A) Schematic of the *PAH* locus showing location of ddPCR amplicons with respect to exons (ex) and introns (in). The genome-editing target sites and extent of deletions determined by molecular approaches are also illustrated. Key: Blue box, *PAH* exons with intervening introns; Pink box, CRISPR sgRNA sites; Yellow box,**

ddPCR amplicons; black bars, region deleted; green bar, insertion/duplication. **(B-I)** Representative 1-D amplitude plots for *GAPDH* as a control, and for six *PAH* genomic amplicons in 116-1, 116-2, Yucatan (Yuc) control, and no template control (NTC). Experiments were performed using 5 ng **(B-G)** or 25 ng **(H,I)** of input genomic DNA. Blue dots represent positive droplets whereas black dots represent negative droplets. Below each 1-D amplitude plot measuring absorbance of Evagreen as a proxy for genomic amplification the numbers of positive (Pos.) and accepted (Total) droplets and the concentration (Conc.) in copies/ $\mu$ l of each PCR amplicon per sample are shown.

**Supplemental Figure S7. Sanger sequencing chromatograms spanning deletion breakpoints and scarred alleles in the founding PKU pigs.**

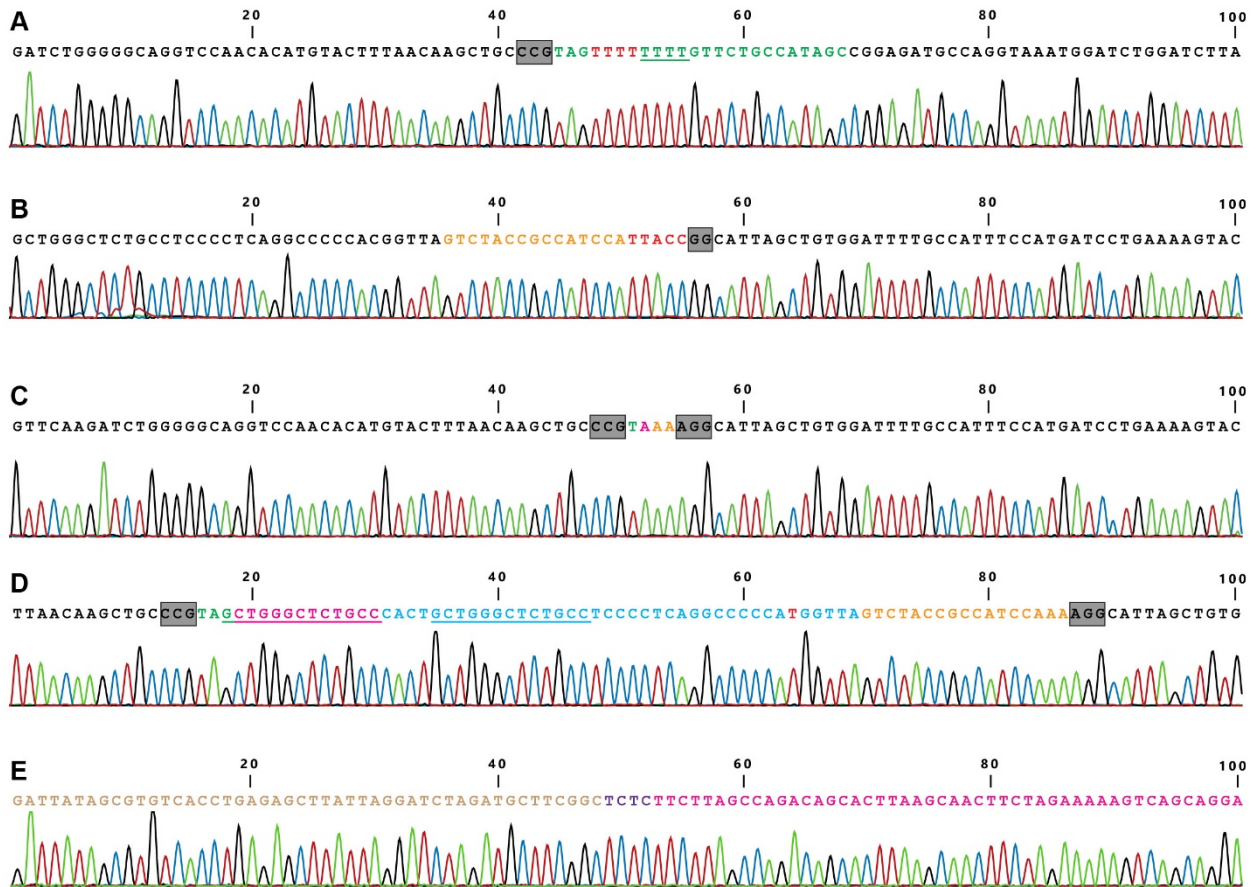

**Supplemental Figure S7. Sanger sequencing chromatograms spanning deletion breakpoints and scarred alleles in the founding PKU pigs. (A) 116-2 sgRNA5-1 scarred allele within *PAH* intron 5. (B) 116-2 sgRNA6-2 scarred allele within *PAH* intron 6. (C) 116-2 deletion allele (exon 6). (D) 116-1 deletion allele-1 (exon 6). (E) 116-1 deletion allele-2 (exon 6-7).**

**Supplemental Figure S8. DNA sequence analyses for the top predicted sgRNA5-1 off-target sites.**

**A. 5-1 Off-target #1 Chr4 GCTATATCAGAACAAAAGTAGAG**

Yucatan (Control)

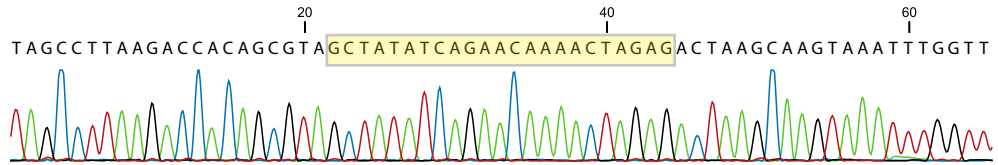

116-1 (PKU affected)

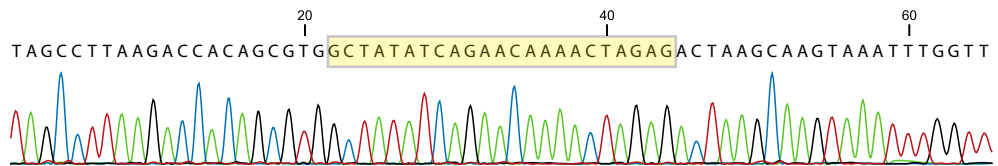

116-2 (PKU carrier)

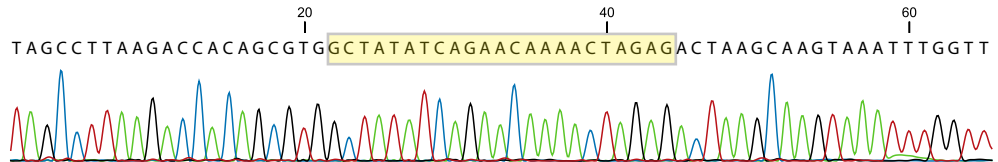

**B. 5-1 Off-target #2 Chr16 AATATGCCAGAACAAAAGTATGG**

Yucatan (Control)

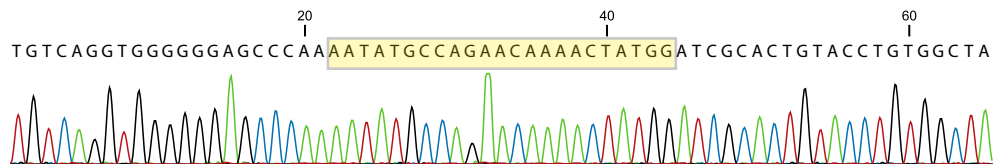

116-1 (PKU affected)

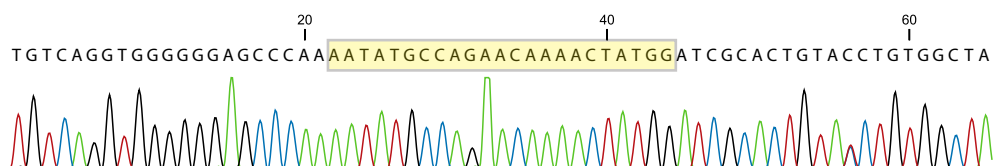

116-2 (PKU carrier)

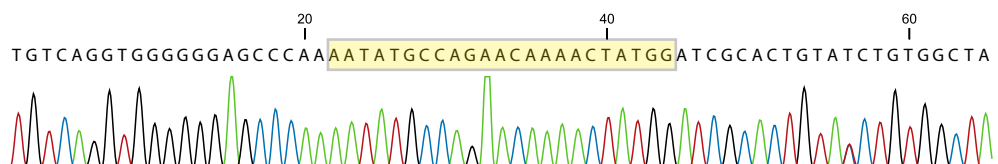

**C. 5-1 Off-target #3 Chr13 TCCTGGGCAGAACAAAAGTAAAG**

Yucatan (Control)

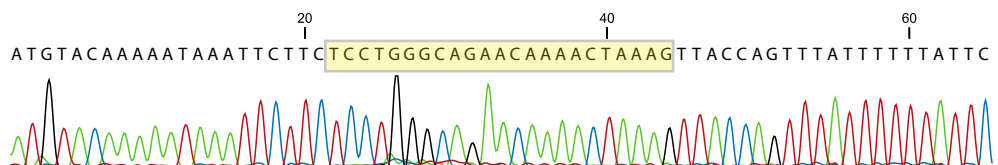

116-1 (PKU affected)

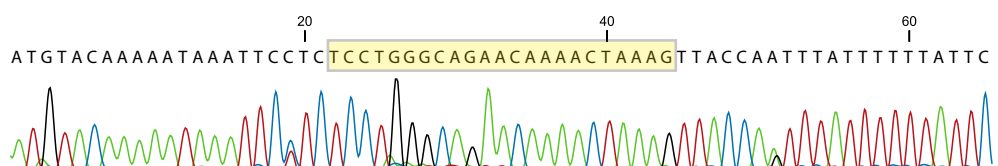

116-2 (PKU carrier)

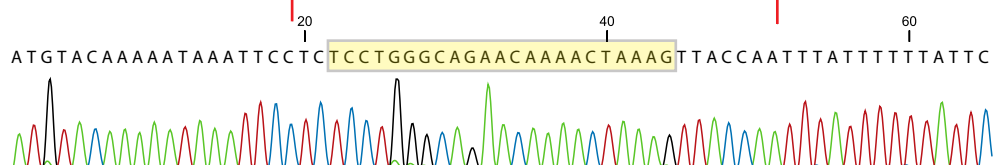

Supplemental Figure S8 (cont.)

D. 5-1 Off-target #4 Chr14 AAAGTGGCAGAACA AAAACTAGAG

Yucatan (Control)

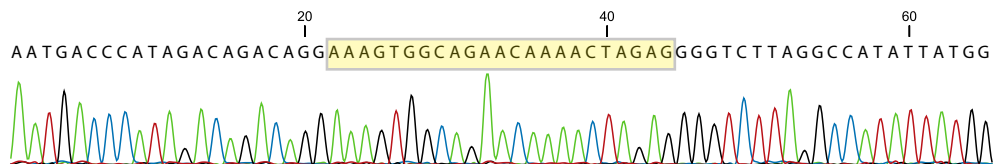

116-1 (PKU affected)

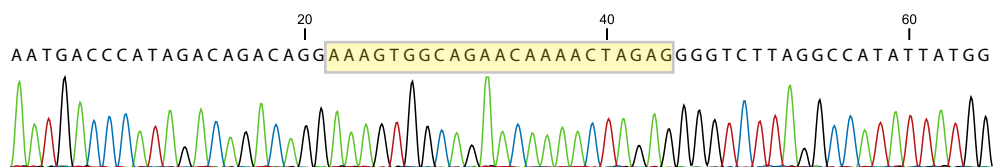

116-2 (PKU carrier)

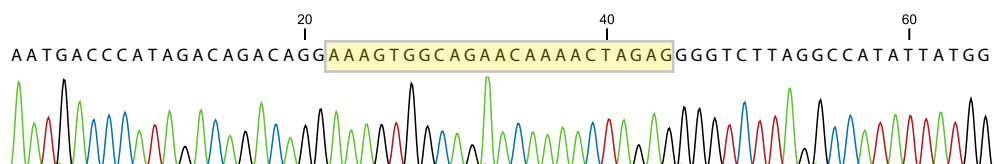

E. 5-1 Off-target #5 Chr6 GTTTTGCAAGAACA AAAACTAAAG

Yucatan (Control)

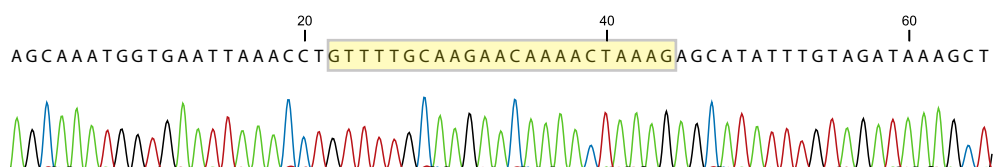

116-1 (PKU affected)

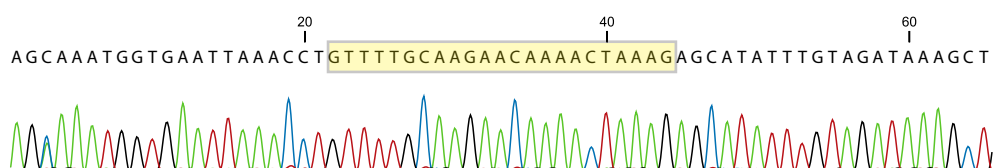

116-2 (PKU carrier)

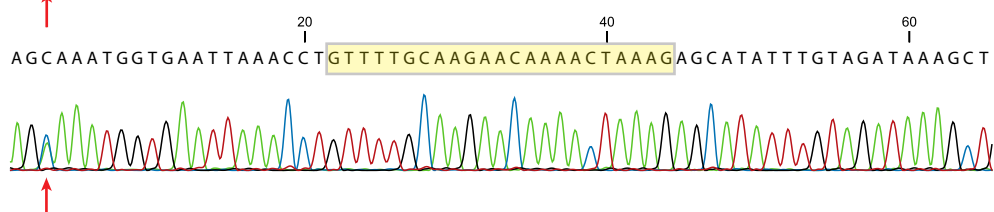

F. 5-1 Off-target #6 Chr13 CGGATGCCAGAACA AAAACTACAG

Yucatan (Control)

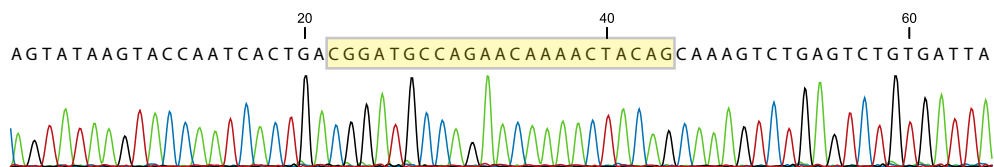

116-1 (PKU affected)

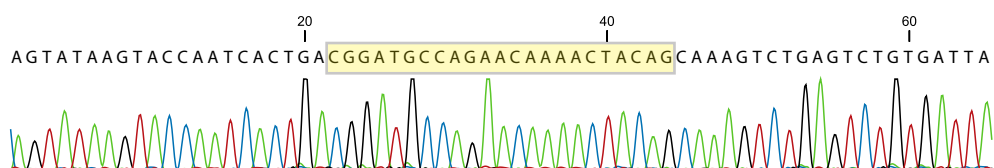

116-2 (PKU carrier)

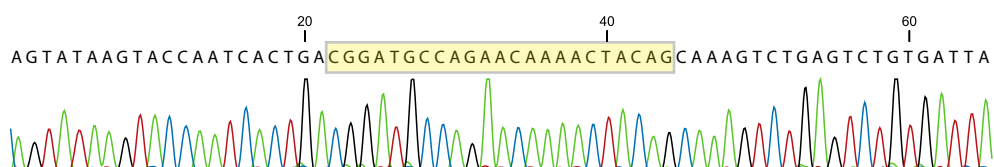



Supplemental Figure S8 (cont.)

G. 5-1 Off-target #7 GL892891.1 GATCTAGAAGAACAATAAGG

Yucatan (Control)

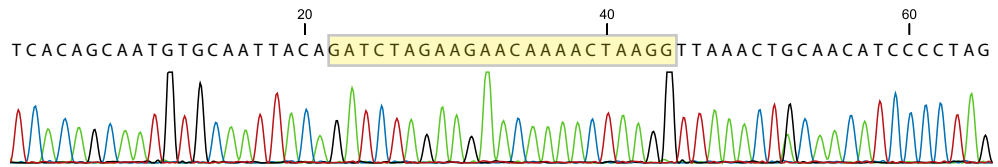

116-1 (PKU affected)

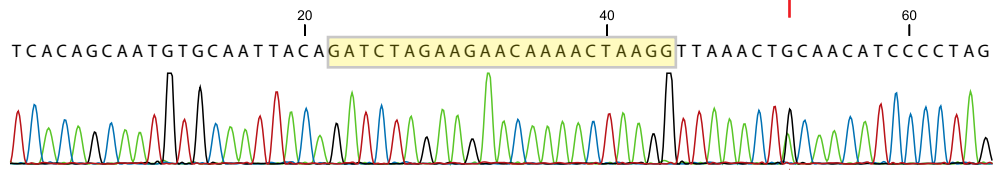

116-2 (PKU carrier)

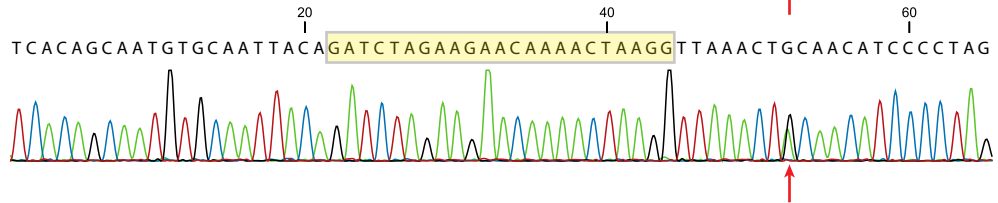

H. 5-1 Off-target #8 Chr8 TCAATGCCAGAAGAAAATAAG

Yucatan (Control)

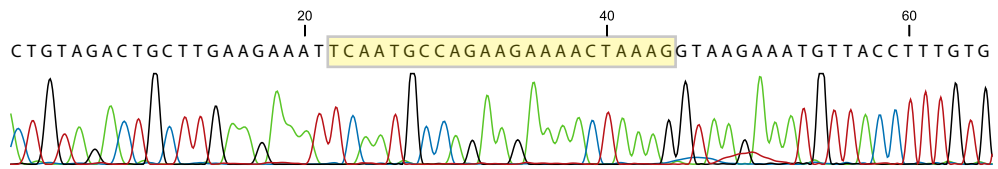

116-1 (PKU affected)

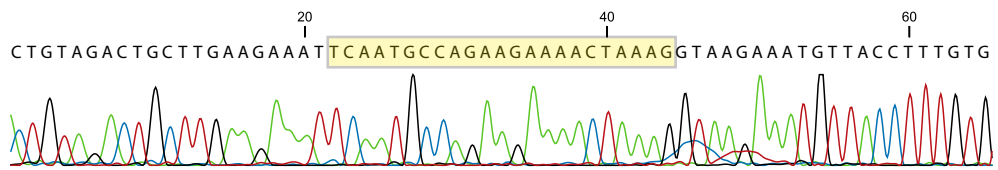

116-2 (PKU carrier)

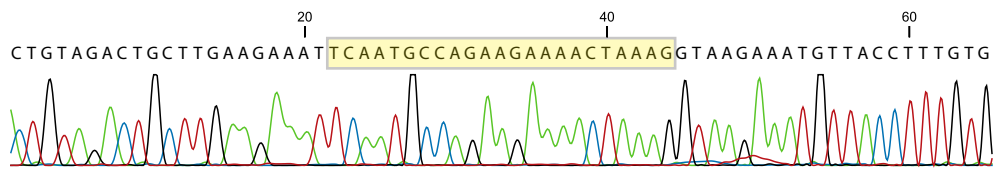



**Supplemental Figure S8. DNA sequence analyses for the top predicted off-target sites for sgRNA5-1. A-H:** For each panel, at top is shown the off-target rank, chromosome location, and DNA sequence of the 23-nt sequence matching the 20-nt guide and 3-nt PAM. Underneath are the DNA sequence traces produced by genomic PCR and direct sequencing, for Yucatan control (top), 116-1 compound heterozygous pig (middle) and 116-2 heterozygous carrier pig (bottom) with the off-target site highlighted in yellow. SNPs distinguishing alleles are noticeable by dual peaks and are marked by red arrows. The following SNPs were identified: Two SNPs (C/T and G/A) bordering sgRNA5-1 off-target #3 (**Fig. S7C**) were heterozygous in 116-1; a heterozygous SNP (C/A) upstream of sgRNA5-1 off-target #5 (**Fig. S7E**) shared by both affected and carrier PKU pigs while being a unambiguous C in Yucatan; and a heterozygous polymorphism (G/A) in 116-1, 116-2 and Yucatan that was present 8-nt distal of sgRNA5-1 off-target #7 (**Fig. S7G**). Notably there were no indel mutations at any of the eight potential off-targets which would be expected from NHEJ repair of CRISPR/Cas9 nucleolytic cleavage. Off-target sites were predicted using the original MIT CRISPR sgRNA design program based on *S. scrofa* genome build 10.2, however, two predicted top ranking off-target sites were derived from mis-assembly of genome sequence and were excluded from the analysis. One of these resulted from a duplicated on-target *PAH* locus sequence assembly error, and the second at a sequence contig assembled on chromosome 13 and incorrectly on chromosome X.

**Supplemental Figure S9. DNA sequence analyses for the top predicted sgRNA6-2 off-target sites.**

**A. 6-2 Off-target #1 Chr1 AGCTCCCTCCATCCAAGAAAAGG**

Yucatan (Control)

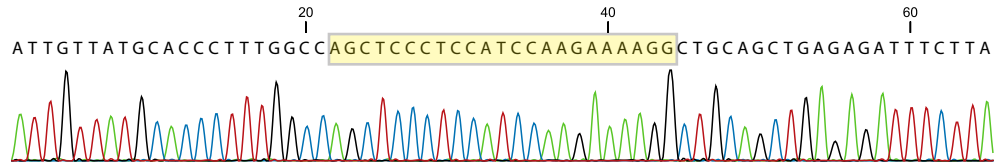

116-1 (PKU affected)

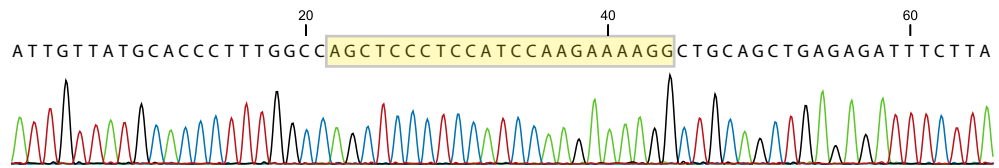

116-2 (PKU carrier)

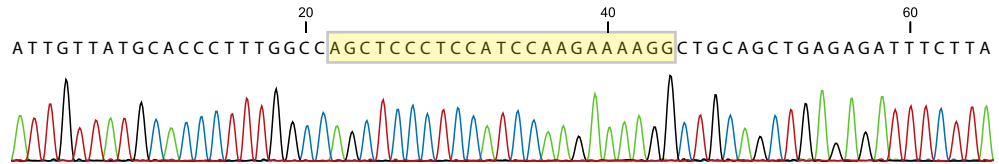

**B. 6-2 Off-target #2 Chr11 GGACACCACCATCCAAGAAACGG**

Yucatan (Control)

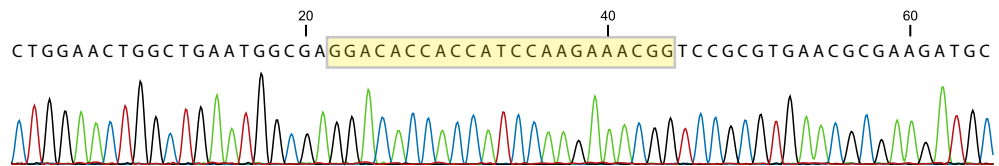

116-1 (PKU affected)

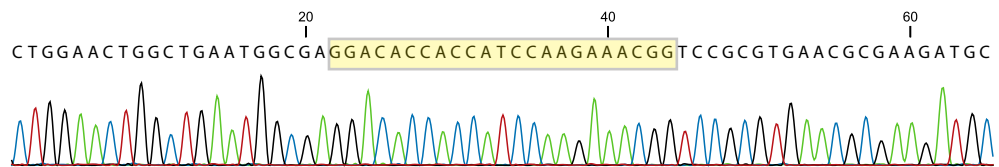

116-2 (PKU carrier)

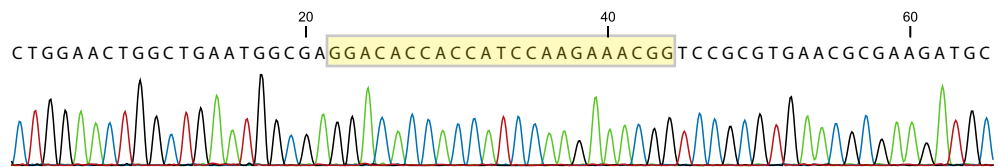

**C. 6-2 Off-target #3 Chr9 GTATCCCCAATCCAAGAAAAGG**

Yucatan (Control)

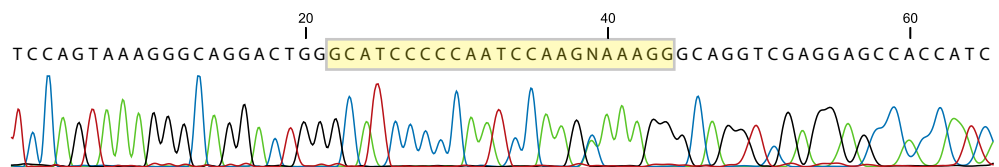

116-1 (PKU affected)

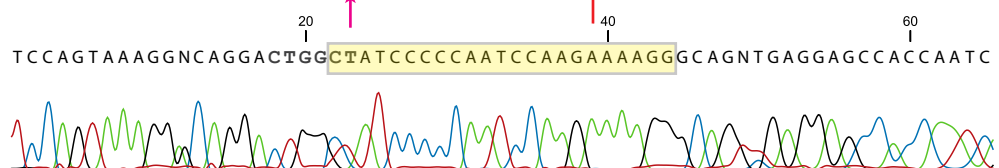

116-2 (PKU carrier)

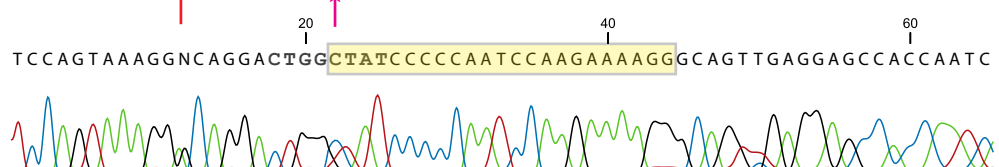

Supplemental Figure S9 (cont.)

D. 6-2 Off-target #4 Chr7 GTCTGCTGTCATCCAAGAAAAAG

Yucatan (Control)

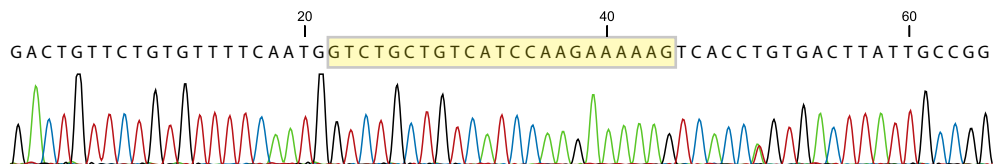

116-1 (PKU affected)

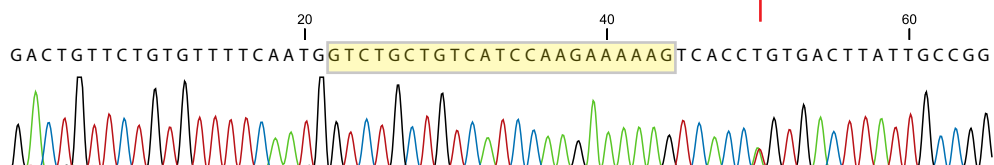

116-2 (PKU carrier)

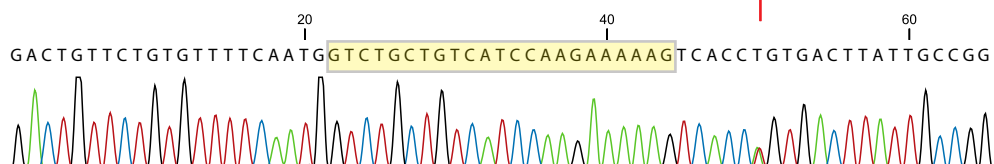

E. 6-2 Off-target #5 Chr9 TTCATCTGCCATCCAAGAAACAG

Yucatan (Control)

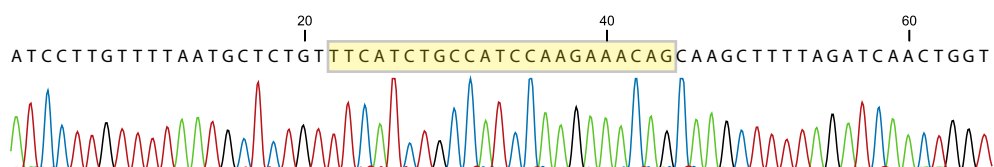

116-1 (PKU affected)

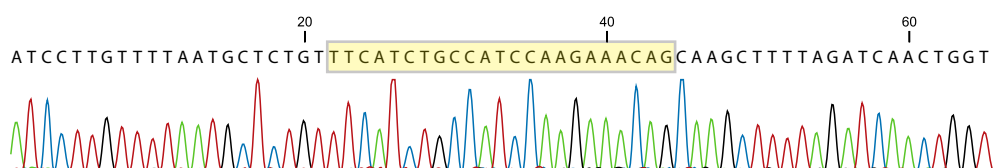

116-2 (PKU carrier)

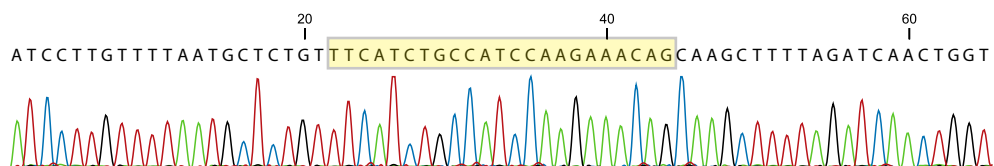

F. 6-2 Off-target #6 Chr7 GGCCACGCCCATCCAAGAAATAG

Yucatan (Control)

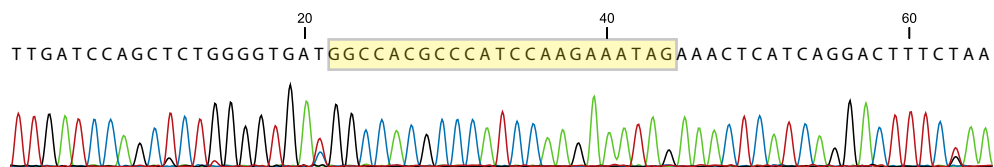

116-1 (PKU affected)

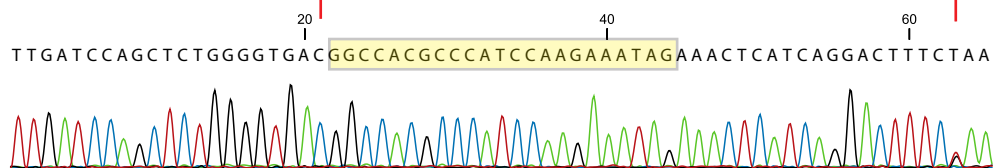

116-2 (PKU carrier)

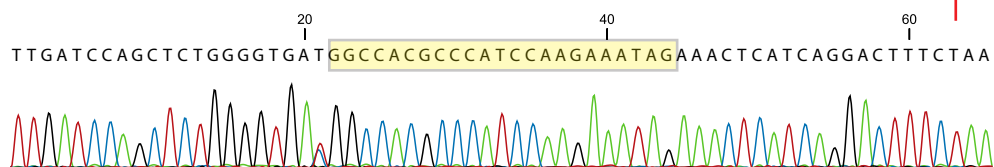

Supplemental Figure S9 (cont.)

G. 6-2 Off-target #7 Chr4 GTCTCCCGCAATCCAAGAGAAAG

Yucatan (Control)

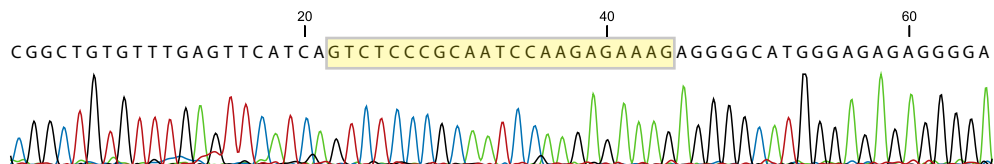

116-1 (PKU affected)

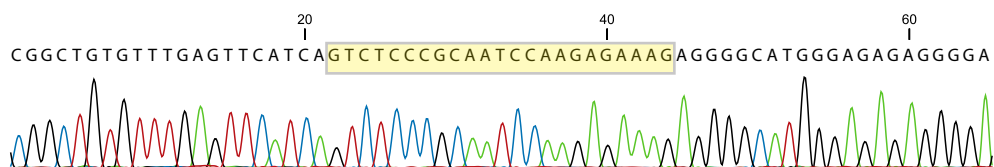

116-2 (PKU carrier)

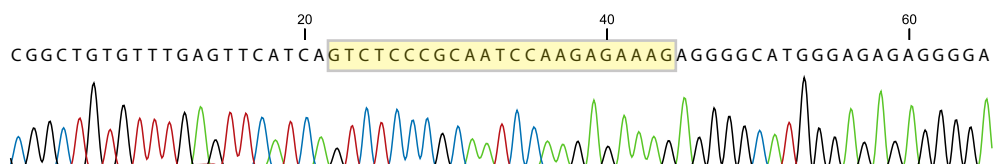

H. 6-2 Off-target #8 Chr2 GGCTTCCTCCAACCAAGAAAGAG

Yucatan (Control)

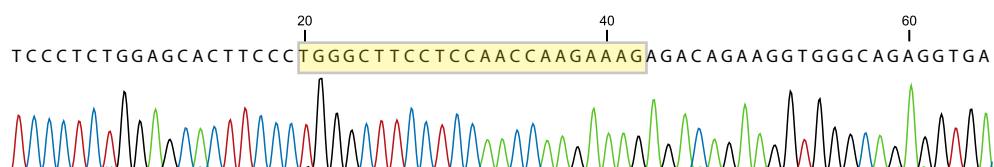

116-1 (PKU affected)

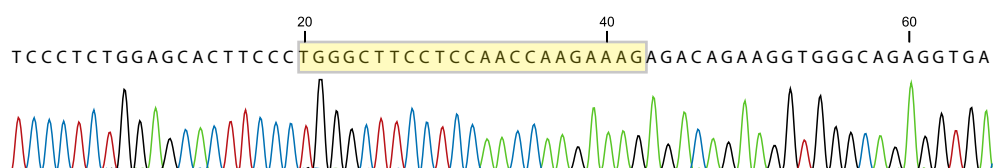

116-2 (PKU carrier)

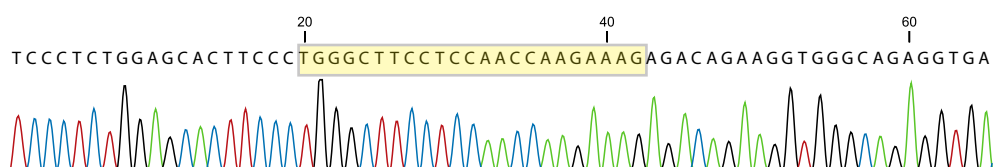

I. 6-2 Off-target #9 Chr14 GCCTCCCGGCATCCAAGAAATGG

Yucatan (Control)

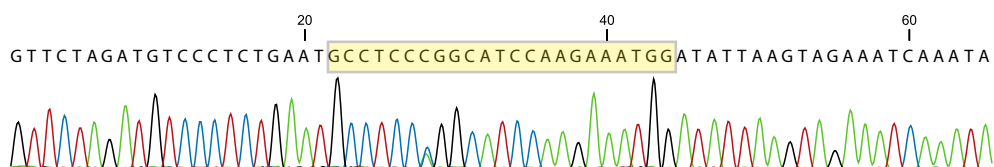

116-1 (PKU affected)

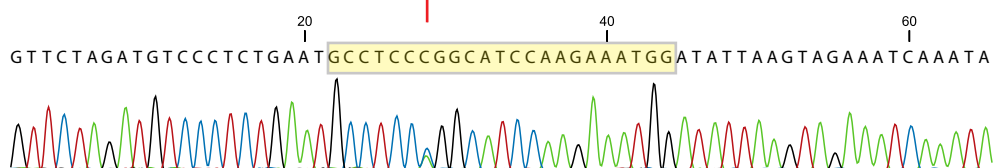

116-2 (PKU carrier)

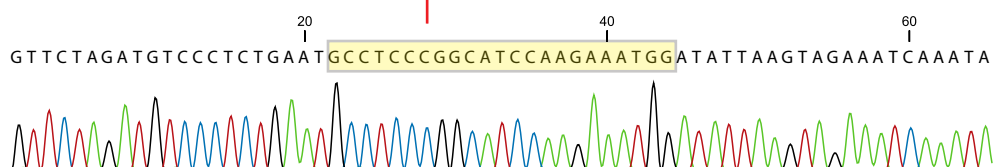

Supplemental Figure S9 (cont.)

J. 6-2 Off-target #10 Chr1 GTTTAAATCCATCCAAGAAATAG

Yucatan (Control)

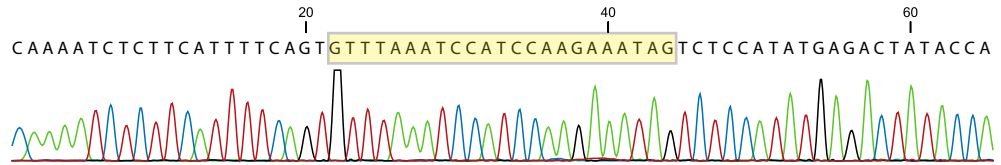

116-1 (PKU affected)

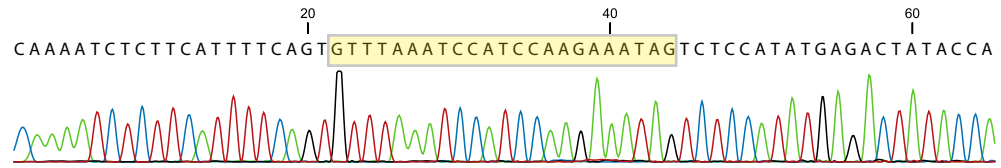

116-2 (PKU carrier)

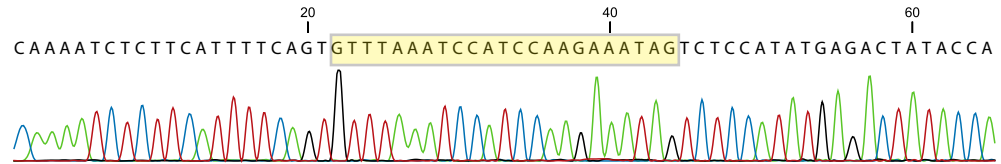

**Supplemental Figure S9. DNA sequence analyses for the top predicted off-target sites for sgRNA6-2. A-J:** For each panel, the off-targets, SNPs and DNA sequence traces from genomic PCR and direct DNA sequencing for Yucatan control (top), 116-1 compound heterozygous pig (middle) and 116-2 heterozygous pig (bottom) are presented as for **Fig. S7** with the addition of magenta arrows indicating homozygous polymorphisms at proximal sgRNA6-2 off-target #3. Polymorphisms were detected in the following potential sgRNA6-2 off-targets sites: For 6-2 off-target #3 (**Fig. S8C**) there are a total of four polymorphisms, including a heterozygous SNP (G/A) upstream of the off-target in 116-1 and 116-2 which was an unambiguous G in Yucatan; then there are adjacent homozygous polymorphisms at the off-target positions 1 (G or C) and 2 (C or T) with GT for the reference genome (Duroc), GC for Yucatan, and CT at positions 1-2 for the two PKU founder pigs; and a heterozygous SNP (C/A) in Yucatan at the off-target position 18 that is an unambiguous A in both PKU founder pigs. Additionally there was a heterozygous SNP (A/T) present distal to 6-2 off-target #4 present in Yucatan and the two founding PKU pigs (**Fig. S8D**); a heterozygous SNP (C/T) in the Yucatan and 116-2 1-nt upstream of sgRNA6-2 off-target #6 which was an unambiguous C in 116-1, as well as a heterozygous SNP (T/G) in Yucatan and 116-1 distal of sgRNA6-2 off-target #6 which was an unambiguous T in 116-2 (**Fig. S8F**); and a heterozygous SNP (C/A) in Yucatan and 116-1 at sgRNA6-2 off-target #9 position 7 which was an unambiguous C in 116-2 (**Fig. 8I**). Given that the polymorphisms detected mostly occur outside the off-target sites and/or also in the Yucatan control, they are likely natural variations and not induced by CRISPR/Cas9. Furthermore, there were no indel mutations at the canonical sgRNA position 17 Cas9 preferred nuclease site that might be predicted to occur during off-target genome-editing; the only SNP at this position occurred in the Yucatan control.

**Supplemental Figure S10. Alignment of paired-end reads from 116-1 overlapping RS1108162262 in the homopolymer 10A/11A SNP.**

**A.**

```
>GWNJ-0965:486:GW1909262516th:4:1102:26007:43378
GGTTTTCAAAGGAACCTTCGAACTAATGACTCTCAGATTATAGCGTGTACCTGAGAGCTTATTAGGATCTAGATG
CTTCGGCTCTCTTCTTAGCCAGACAGCACTTAAGCAACTTCTAGAAAAAGTCAGCAGGACATCCCAAATGATCTTTC
CCTGCCCCGAAAGTTTCATTCCAATAAATAAAAAAAAAGGCCTGTTCTTCATAACCTGGCACATCAAGTGTTCAAT
AAATGCAGGTTTTTCTTCTGCCCCAATGGCTGCCCTCC
```

```
>GWNJ-0965:486:GW1909262516th:4:2102:3417:56106
AAGGAACCTTCGATGGTTTTCAAAGGAACCTTCGAACTAATGACTCTCAGATTATAGCGTGTACCTGAGAGCTTA
TTAGGATCTAGATGCTTCGGCTCTCTTAGCCAGACAGCACTTAAGCAACTTCTAGAAAAAGTCAGCAGGACATC
CCAAATGATCTTCCCTGCCCCGAAAGTTTCATTCCAATAAATAAAAAAAAAGGCCTGTTCTTCATAACCTGGCAC
ATCAAGTGTTCAATAAATGCAGGTTTTTCTTCT
```

**B.**

```
>GWNJ-0965:486:GW1909262516th:4:1115:24109:8447
AATCCGCACCTAGATGACTCCGCTGTCTCTCGGCCTGGATCGGGCTCGGCCGGAGTAGAGGAGGACTGGGCAGGTGC
TTCTTACCTTTGCACTTAGATCTCTTCTTAGCCAGACAGCACTTAAGCAACTTCTAGAAAAAGTCAGCAGGACATCC
CAAATGATCTTCCCTGCCCCGAAAGTTTCATTCCAATAAATAAAAAAAAAGGCCTGTTCTTCATAACCTGGCACAT
CAAGTGTT
```

```
>GWNJ-0965:486:GW1909262516th:4:1209:21359:12332
GCCGGAGTAGAGGAGGACTGGGCAGGTGCTTCTTACCTTTGCACTTAGATCTCTTCTTAGCCAGACAGCACTTAAGC
AACTTCTAGAAAAAGTCAGCAGGACATCCCAAATGATCTTCCCTGCCCCGAAAGTTTCATTCCAATAAATAAAA
GGCCTGTTCTTCATAAC
```

```
>GWNJ-0965:486:GW1909262516th:4:2121:5355:69344
CCAAGAGACTGTAGAAGTCAGCGCTAAGGAGCGTCCAGTGGGAACAGGAGCAAGGGATGGCCAGGCCAGCCCCCAC
CTCCTGAATCCGCACCTAGATGACTCCGCTGTCTCTCGGCCTGGATCGGGCTCGGCCGGAGTAGAGGAGGACTGGGC
AGGTGCTTCTTACCTTTGCACTTAGATCTCTTCTTAGCCAGACAGCACTTAAGCAACTTCTAGAAAAAGTCAGCAGG
ACATCCCAAATGATCTTCCCTGCCCCGAAAGTTTCATTCCAATAAATAAAAAG
```

**Supplemental Figure S10. Alignment of paired-end reads from 116-1 overlapping**

**RS1108162262 in the homopolymer 10A/11A SNP. (A) Two independent paired-end reads**

cover the microhomology mediated intron5-intron7 breakpoint in 116-1 allele 2 (exon 6-7

deletion) and RS1108162262 11A reference alternate variant sequence. (B) Three unique paired-

end reads that overlap the 10A RS1108162262 variant and contiguous sequence surrounding the

intron 7 TCTC microhomology region without a breakpoint. Key: Joined paired-end fastq read

sequence as text with intron 5 in blue and intron 7 in purple, overlapping portions of paired-end

sequences underlined, TCTC microhomology highlighted in magenta, and 10A/11A polymorphism highlighted in yellow and red, respectively.

### Supplemental References

1. D. J. Chia, B. Varco-Merth, P. Rotwein, Dispersed chromosomal Stat5b-binding elements mediate growth hormone-activated insulin-like growth factor-I gene transcription. *J Biol Chem* **285**, 17636-17647 (2010).
